# Supplementary material
Source: PubMed Central journal article supplement (PMC3262083)

## Supporting Information

### Total Synthesis of [ $\Psi$ [C(=S)NH]Tpg<sup>4</sup>]Vancomycin Aglycon, [ $\Psi$ [C(=NH)NH]Tpg<sup>4</sup>]Vancomycin Aglycon, and Related Key Compounds: Reengineering Vancomycin for Dual D-Ala-D-Ala and D-Ala-D-Lac Binding

Jian Xie, Akinori Okano, Joshua G. Pierce, Robert C. James, Simon Stamm, Christine M. Crane, and Dale L. Boger\*

*Department of Chemistry and The Skaggs Institute for Chemical Biology  
The Scripps Research Institute, 10550 North Torrey Pines Road, La Jolla, California 92037*

Improved protocol for the macrocyclization of **9**.

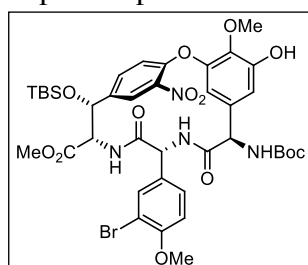

**Table S1.** Selected cyclization conditions examined.

| Entry | Base 1                                 | Additive                 | Solvent | Temperature (°C) | Time (h) | Conversion (%) | Yield (%), <i>M-10</i> : <i>P-10</i> |
|-------|----------------------------------------|--------------------------|---------|------------------|----------|----------------|--------------------------------------|
| 1     | K <sub>2</sub> CO <sub>3</sub> 20 eq.  | CaCO <sub>3</sub> 20 eq. | DMF     | 45 °C            | 18       | 100            | 60-68%, 1.1:1                        |
| 2     | Li <sub>2</sub> CO <sub>3</sub> 5 eq.  | CaCO <sub>3</sub> 10 eq. | DMF     | 45 °C            | 14       | 66             | 51%, 1:1.5                           |
| 3     | Li <sub>2</sub> CO <sub>3</sub> 40 eq. | CaCO <sub>3</sub> 10 eq. | DMF     | 45 °C            | 20       | 50             | 47%, 1.2:1                           |
| 4     | Li <sub>2</sub> CO <sub>3</sub> 20 eq. | CaCO <sub>3</sub> 10 eq. | DMF     | 75 °C            | 20       | 98             | 65%, 1.2:1                           |
| 5     | Rb <sub>2</sub> CO <sub>3</sub> 5 eq.  | CaCO <sub>3</sub> 10 eq. | DMF     | 45 °C            | 14       | 84             | 37%, 1:1.5                           |
| 6     | Cs <sub>2</sub> CO <sub>3</sub> 5 eq.  | CaCO <sub>3</sub> 10 eq. | DMF     | 45 °C            | 14       | 86             | 37%, 1:3.0                           |
| 7     | K <sub>2</sub> CO <sub>3</sub> 20 eq.  | CaCO <sub>3</sub> 20 eq. | THF     | 45 °C            | 40       | 25             | 18%, 1.8:1                           |
| 8     | K <sub>2</sub> CO <sub>3</sub> 20 eq.  | CaCO <sub>3</sub> 20 eq. | THF     | 75 °C            | 40       | 100            | 43%, 1.8:1                           |
| 9     | Li <sub>2</sub> CO <sub>3</sub> 20 eq. | CaCO <sub>3</sub> 10 eq. | DMSO    | 45 °C            | 20       | 100            | 63%, 1.2:1                           |
| 10    | Li <sub>2</sub> CO <sub>3</sub> 20 eq. | CaCO <sub>3</sub> 20 eq. | DMSO    | 25 °C            | 20       | <5             | --                                   |
| 11    | K <sub>2</sub> CO <sub>3</sub> 20 eq.  | CaCO <sub>3</sub> 20 eq. | DMSO    | 25 °C            | 4-8      | 100            | 75-85%, 1:1.2                        |

**Compound 10.** Method A: A vial containing  $\text{K}_2\text{CO}_3$  (3.03 g, 22 mmol, 20 equiv),  $\text{CaCO}_3$  (2.22 g, 22 mmol, 20 equiv), 4Å molecular sieves (2 g, 2 w/w equiv) under Ar was treated with anhydrous DMSO (220 mL) followed by **9** (1.00 g, 11 mmol). The reaction mixture was stirred at 25 °C for 4 h. The reaction mixture was filtered through a plug of Celite, and quenched with cold saturated aqueous  $\text{NH}_4\text{Cl}$  (400 mL). The aqueous phase was extracted with cold EtOAc (3 × 100 mL) and saturated aqueous NaCl (100 mL), dried ( $\text{Na}_2\text{SO}_4$ ) and the solvent removed under reduced pressure. Chromatography ( $\text{SiO}_2$ , 50% EtOAc–hexane to 40% acetone–hexane gradient elution) afforded (*P*)-**10** (natural atropisomer, 410 mg, 42%) as a foam followed by (*M*)-**10** (unnatural atropisomer, 415 mg, 43%) as a foam identical in all respects with material previously disclosed.<sup>17</sup> For (*P*)-**10**: mp 42 °C (dec);  $[\alpha]_{\text{D}}^{25} -35$  (*c* 0.1,  $\text{CHCl}_3$ );  $^1\text{H}$  NMR (acetone-*d*<sub>6</sub>, 400 MHz)  $\delta$  8.32 (s, 1H), 8.16 (d, *J* = 2.1 Hz, 1H), 7.68–7.62 (m, 1H), 7.58–7.48 (m, 2H), 7.37 (d, *J* = 8.6 Hz, 1H), 7.37–7.32 (m, 1H), 7.18 (d, *J* = 8.4 Hz, 1H), 6.76 (d, *J* = 2.2 Hz, 1H), 6.68 (d, *J* = 2.2 Hz, 1H), 6.35–6.25 (m, 1H), 5.90 (d, *J* = 8.5 Hz, 1H), 5.62 (s, 1H), 5.49 (d, *J* = 7.4 Hz, 1H), 5.19–5.10 (m, 1H), 4.56 (d, *J* = 8.5 Hz, 1H), 3.944 (s, 3H), 3.936 (s, 3H), 3.78 (s, 3H), 1.39 (s, 9H), 0.79 (s, 9H), 0.02 (s, 3H), -0.11 (s, 3H);  $^{13}\text{C}$  NMR (acetone-*d*<sub>6</sub>, 125 MHz)  $\delta$  169.8, 169.1, 168.5, 157.1, 152.8, 151.7, 151.4, 143.5, 138.7, 138.6, 133.6, 132.4, 130.3, 129.8, 124.60, 124.57, 122.9, 113.3, 113.2, 112.6, 109.9, 79.4, 74.2, 61.5, 61.3, 60.9, 58.2, 57.6, 53.0, 28.5 (3C), 25.9 (3C), 18.3, -4.3, -5.7; IR (film)  $\nu_{\text{max}}$  3408, 2956, 1742, 1709, 1677, 1582, 1530, 1495, 1343, 1252, 1166, 110  $\text{cm}^{-1}$ ; ESI-TOF HRMS *m/z* 1021.1332 ( $\text{M}^+ + \text{Na}$ ,  $\text{C}_{39}\text{H}_{49}\text{N}_4\text{O}_{13}\text{BrSi}$  requires 1021.1303).

Method B: A round-bottom flask containing  $\text{K}_2\text{CO}_3$  (6.06 g, 44.0 mmol) and 4Å molecular sieves (4.00 g, powdered) in anhydrous DMSO (400 mL) was treated with *nano*- $\text{CaCO}_3$  (8.88 mL of 0.5 g/1 mL suspension, 340 nm particle size, 44.0 mmol)<sup>S1</sup> and **9** (2.00 g, 2.20 mmol) in anhydrous DMSO (40 mL). The reaction mixture was stirred at room temperature for 6 h, then filtered through Celite. The filtrate was added to saturated aqueous  $\text{NH}_4\text{Cl}$  (80 mL) and extracted with EtOAc. The organic layer was washed with  $\text{H}_2\text{O}$  and saturated aqueous NaCl, and dried ( $\text{Na}_2\text{SO}_4$ ). The solvent was removed under reduced pressure and the residue was purified by flash chromatography ( $\text{SiO}_2$ , 50% EtOAc–hexane) to provide (*P*)-**10** (581 mg, 30%) as a yellow foam, followed by (*M*)-**10** (917 mg, 46%) as an orange foam. Typical conversions on this scale were 75–85% using this procedure. The spectroscopic and analytical data for each were in accordance with that reported for authentic samples.<sup>17</sup>

Method C: A round-bottom flask containing  $\text{K}_2\text{CO}_3$  (7.60 g, 55.0 mmol),  $\text{CaCO}_3$  (5.50 g, 55.0 mmol) and 4Å molecular sieves (7.50 g, powdered) was purged with argon and flame-dried under high vacuum for 1 min. The flask was cooled to room temperature and anhydrous DMSO (500 mL) and **9** (2.50 g, 2.75 mmol) were added. The resulting mixture was stirred at room temperature for 10 h, then filtered through a plug of Celite. The filtrate was added to saturated aqueous  $\text{NH}_4\text{Cl}$  (100 mL) and extracted with EtOAc. The organic layer was washed with  $\text{H}_2\text{O}$  and saturated aqueous NaCl, and dried ( $\text{Na}_2\text{SO}_4$ ). The solvent was removed under reduced pressure and the residue was purified by flash chromatography ( $\text{SiO}_2$ , 50% EtOAc–hexane) to provide (*P*)-**10** (734 mg, 30%) as a yellow foam, followed by (*M*)-**10** (943 mg, 38%) as an orange foam. The spectroscopic and analytical data for each were in accordance with that reported for authentic samples.

**Improved procedure for unnatural (*M*)-**10** to natural (*P*)-**10** atropisomer equilibration.** A microwave vial containing (*M*)-**10** (100 mg, 0.113 mmol) under Ar was treated with *o*-dichlorobenzene (purified by basic  $\text{AlO}_3$  plug, storage over 4Å molecular sieves, and

<sup>S1</sup> Prepared by milling  $\text{CaCO}_3$  with HD ZrO (1:6,  $\text{CaCO}_3$  to beads) over 7 days.

degassed with Ar). The vial was sealed and heated by means of microwave irradiation (210 °C, 2 x 6 min, high absorbance). The reaction mixture was cooled and loaded onto a SiO<sub>2</sub> column (1 x 12 cm, 100% hexanes until *o*-dichlorobenzene eluted, then 50% EtOAc–hexanes until (*P*)-**10** eluted, followed by 40% acetone hexanes) to afford (*P*)-**10** (45 mg, 45%) and (*M*)-**10** (44 mg, 44%) as tan films.

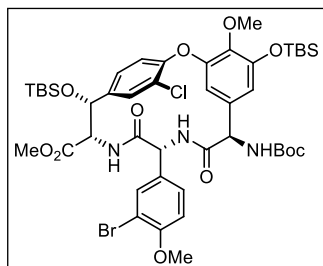

**Compound 12.** A solution of **11** (615 mg, 0.700 mmol) and imidazole (238 mg, 3.50 mmol) in anhydrous CH<sub>2</sub>Cl<sub>2</sub> (12 mL) was treated with *tert*-butylchlorodimethylsilane (316 mg, 2.10 mmol) at 0 °C and the mixture was stirred for 45 min. The solvent was removed under reduced pressure and the residue was purified by flash chromatography (SiO<sub>2</sub>, 5–12% acetone–CH<sub>2</sub>Cl<sub>2</sub> gradient) to afford **12** (700 mg, quant.) as a colorless solid: m.p. 166–168 °C; [ $\alpha$ ]<sub>D</sub><sup>25</sup> –39 (*c* 0.22, MeOH); <sup>1</sup>H NMR (CD<sub>3</sub>OD, 600 MHz, rotamers (10:1), major given)  $\delta$  7.55 (s, 1H), 7.51 (br s, 1H), 7.40 (dd, *J* = 1.5, 8.4 Hz, 1H), 7.21 (br s, 1H), 7.20 (s, 1H), 7.13 (d, *J* = 8.6 Hz, 1H), 6.70 (d, *J* = 1.4 Hz, 1H), 6.54 (d, *J* = 1.4 Hz, 1H), 5.45 (d, *J* = 1.4 Hz, 1H), 5.37 (s, 1H), 5.20 (br s, 1H), 4.66 (s, 1H), 3.96 (s, 3H), 3.93 (s, 3H), 3.77 (s, 3H), 1.44 (s, 9H), 1.05 (s, 9H), 0.80 (s, 9H), 0.25 (s, 3H), 0.24 (s, 3H), 0.01 (s, 3H), –0.10 (s, 3H); <sup>13</sup>C NMR (CD<sub>3</sub>OD, 150 MHz, rotamers (10:1), major given)  $\delta$  171.4, 170.6, 169.9, 158.2, 158.1, 154.5, 153.4, 151.3, 142.1, 139.8, 135.2, 134.4, 130.7, 130.4, 129.1, 128.5, 127.3, 124.0, 116.9, 113.6, 113.4, 110.1, 81.0, 74.9, 61.7, 61.5, 58.9, 58.6, 57.0, 53.4, 28.9, 26.4, 26.4, 19.4, 18.9, –4.1, –4.15, –4.21, –5.4; IR (film)  $\nu_{\max}$  3420, 3307, 2953, 2931, 2895, 2857, 1705, 1658, 1603, 1580, 1495, 1472, 1433, 1392, 1364, 1333, 1284, 1253, 1163, 1096, 1064, 1007 cm<sup>–1</sup>; ESI-TOF HRMS *m/z* 992.2956 (M<sup>+</sup> + H, C<sub>45</sub>H<sub>63</sub>BrClN<sub>3</sub>O<sub>11</sub>Si<sub>2</sub> requires 992.2946).

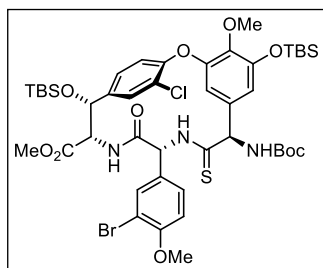

**Compound 13.** A solution of **12** (700 mg, 0.700 mmol) in anhydrous toluene (12 mL) was treated with Lawesson's reagent (recryst. from toluene, 311 mg, 0.770 mmol) at room temperature and the mixture was warmed at 60 °C for 3 h. The reaction mixture was cooled to 25 °C and the solvent was removed under reduced pressure. The residue was purified by flash chromatography (SiO<sub>2</sub>, 25% EtOAc–hexane) followed by PTLC (SiO<sub>2</sub>, 1.5% acetone–CH<sub>2</sub>Cl<sub>2</sub>) to afford **13** (619 mg, 88%) as a colorless solid: m.p. 172–175 °C; [ $\alpha$ ]<sub>D</sub><sup>25</sup> –44 (*c* 0.40, MeOH); <sup>1</sup>H NMR [CDCl<sub>3</sub>, 600 MHz, rotamers (1:1)]  $\delta$  7.56 (d, *J* = 1.8 Hz, 0.5H), 7.45 (s, 0.5H), 7.37 (d, *J* = 1.8 Hz, 0.5H), 7.35 (s, 0.5H), 7.24 (d, *J* = 8.4 Hz, 0.5H), 7.09 (d, *J* = 8.4 Hz, 0.5H), 7.04 (d, *J* = 8.4 Hz, 0.5H), 6.88 (d, *J* = 8.4 Hz, 0.5H), 6.80 (d, *J* = 8.4 Hz, 0.5H), 6.72 (br s, 1H), 6.63 (br s,

1H), 6.22 (s, 0.5H), 5.93 (d,  $J = 9.9$  Hz, 0.5H), 5.77 (d,  $J = 9.1$  Hz, 0.5H), 5.43 (s, 0.5H), 5.29 (s, 0.5H), 5.23 (d,  $J = 5.7$  Hz, 1H), 5.20 (s, 1H), 4.92 (d,  $J = 9.6$  Hz, 0.5H), 4.34 (d,  $J = 11.8$  Hz, 0.5H), 4.00 (s, 1.5H), 3.94 (s, 1.5H), 3.87 (s, 1.5H), 3.84 (s, 1.5H), 3.77 (s, 1.5H), 3.67 (s, 1.5H), 1.41 (s, 9H), 1.02 (s, 4.5H), 1.00 (s, 4.5H), 0.86 (s, 4.5H), 0.70 (s, 4.5H), 0.23 (s, 3H), 0.20 (s, 1.5H), 0.19 (s, 1.5H), 0.00 (s, 1.5H),  $-0.07$  (s, 1.5H),  $-0.07$  (s, 1.5H),  $-0.24$  (s, 1.5H);  $^{13}\text{C}$  NMR [ $\text{CDCl}_3$ , 150 MHz, rotamers (1:1)]  $\delta$  202.6, 199.7, 170.0, 168.9, 168.3, 167.8, 156.2, 155.4, 155.2, 154.3, 154.0, 152.6, 151.7, 150.3, 150.2, 142.8, 139.5, 138.5, 137.0, 135.4, 133.2, 133.1, 132.5, 129.0, 128.7, 128.6, 128.4, 128.1, 127.8, 127.7, 127.4, 127.3, 127.2, 127.1, 126.1, 125.2, 123.0, 117.9, 113.1, 112.4, 112.2, 111.8, 108.5, 105.8, 80.1, 74.5, 73.2, 62.7, 61.6, 61.4, 60.8, 59.8, 57.4, 56.5, 56.3, 53.0, 52.9, 28.6, 28.4, 25.9, 25.8, 25.6, 18.52, 18.46, 18.3, 17.8,  $-4.25$ ,  $-4.29$ ,  $-4.32$ ,  $-4.38$ ,  $-4.42$ ,  $-5.3$ ,  $-5.6$ ; IR (film)  $\nu_{\text{max}}$  3389, 3251, 2952, 2931, 2895, 2857, 1706, 1668, 1602, 1581, 1493, 1416, 1365, 1329, 1286, 1253, 1160, 1097, 1053, 1006  $\text{cm}^{-1}$ ; ESI-TOF HRMS  $m/z$  1008.2727 ( $\text{M}^+ + \text{H}$ ,  $\text{C}_{45}\text{H}_{63}\text{BrClN}_3\text{O}_{10}\text{Si}_2$  requires 1008.2717).

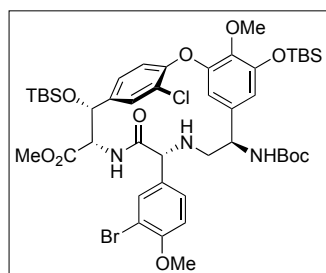

**Compound 15.** A solution of **13** (40.0 mg, 39.6  $\mu\text{mol}$ ) in  $\text{CH}_3\text{OH}$  was treated with excess Raney nickel ( $\sim 200$  mg) and formamidine acetate (20.0 mg) at  $-20$   $^\circ\text{C}$  and warmed to  $0$   $^\circ\text{C}$ . The resulting mixture was stirred under an atmosphere of  $\text{H}_2$  at  $0$   $^\circ\text{C}$  for 3 h. After this time, the reaction mixture was filtered through a plug of Celite (eluted with  $\text{CH}_3\text{OH}$ ) and concentrated under reduced pressure. The residue was purified by PTLC ( $\text{SiO}_2$ , 20% EtOAc–hexane) to afford **15** (22.7 mg, 59%) as a white film:  $[\alpha]_{\text{D}}^{25} +15$  ( $c$  0.4,  $\text{CH}_3\text{OH}$ );  $^1\text{H}$  NMR ( $\text{CD}_3\text{OD}$ , 400 MHz)  $\delta$  7.52 (d,  $J = 1.6$  Hz, 1H), 7.29 (d,  $J = 2.0$  Hz, 1H), 7.24 (dd,  $J = 2.0, 8.4$  Hz, 1H), 7.21–7.16 (m, 2H), 7.12 (d,  $J = 8.4$  Hz, 1H), 6.65 (br s, 1H), 6.61 (d,  $J = 1.6$  Hz, 1H), 5.52 (d,  $J = 2.4$  Hz, 1H), 4.78 (d,  $J = 2.4$  Hz, 1H), 4.55–4.49 (br m, 1H), 4.20 (s, 1H), 4.01 (s, 3H), 3.93 (s, 3H), 3.77 (s, 3H), 3.03 (dd,  $J = 5.6, 8.0$  Hz, 1H), 2.64 (dd,  $J = 3.2, 8.0$  Hz, 1H), 1.44 (s, 9H), 1.08 (s, 9H), 0.77 (s, 9H), 0.29 (s, 3H), 0.28 (s, 3H), 0.02 (s, 3H),  $-0.10$  (s, 3H);  $^{13}\text{C}$  NMR ( $\text{CD}_3\text{OD}$ , 150 MHz)  $\delta$  173.1, 169.9, 157.1, 153.9, 150.0, 141.7, 138.4, 133.2, 130.5, 129.6, 128.3, 127.4, 123.5, 117.0, 112.9, 112.6, 73.4, 65.9, 61.1, 59.8, 56.2, 52.5, 52.1, 28.2, 25.7, 25.6, 18.7, 18.1,  $-4.8$ ,  $-4.9$ ,  $-6.2$ ; IR (film)  $\nu_{\text{max}}$  3321, 2931, 1682, 1494, 1431, 1062  $\text{cm}^{-1}$ ; ESI-TOF HRMS  $m/z$  978.3149 ( $\text{M} + \text{H}^+$ ,  $\text{C}_{45}\text{H}_{65}\text{BrClN}_3\text{O}_{10}\text{Si}_2$  requires 978.3153).

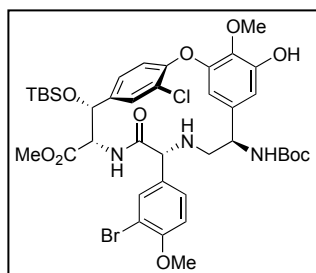

**Compound 16.** A solution of **15** (4.3 mg, 4.4  $\mu\text{mol}$ ) in anhydrous THF (400  $\mu\text{L}$ ) and acetic acid (2  $\mu\text{L}$ , 21.95  $\mu\text{mol}$ ) was treated with  $\text{Bu}_4\text{NF}$  (1.0 M in THF, 4.39  $\mu\text{L}$ , 4.39  $\mu\text{mol}$ ) at room temperature for 0.5 h. The mixture was purified by PTLC ( $\text{SiO}_2$ , 40% EtOAc–hexane) to provide **16** (3.6 mg, 96%) as a white film:  $[\alpha]_D^{25}$   $-18$  ( $c$  0.96,  $\text{CHCl}_3$ );  $^1\text{H}$  NMR (acetone- $d_6$ , 400 MHz)  $\delta$  8.10 (s, 1H), 7.59 (d,  $J$  = 2.0 Hz, 1H), 7.42 (d,  $J$  = 2.1 Hz, 1H), 7.31 (d,  $J$  = 8.4 Hz, 1H), 7.31 (dd,  $J$  = 8.4, 2.1 Hz, 1H), 7.22 (dd,  $J$  = 8.5, 2.5 Hz, 1H), 7.15 (d,  $J$  = 8.5 Hz, 1H), 6.63 (br s, 1H), 6.56 (s, 2H), 5.58 (d,  $J$  = 9.3 Hz, 1H), 5.50 (d,  $J$  = 2.2 Hz, 1H), 4.70 (dd,  $J$  = 9.7, 2.2 Hz, 1H), 4.55 (br s, 1H), 4.15 (s, 1H), 3.99 (s, 3H), 3.92 (s, 3H), 3.74 (s, 3H), 3.16 (dd,  $J$  = 11.8, 6.1 Hz, 1H), 2.70 (br d,  $J$  = 9.0 Hz, 1H), 1.37 (s, 9H), 0.75 (s, 9H), 0.00 (s, 3H),  $-0.13$  (s, 3H);  $^{13}\text{C}$  NMR (acetone- $d_6$ , 150 MHz)  $\delta$  170.4, 169.6, 161.3, 157.8, 155.1, 154.1, 153.7, 152.0, 146.6, 139.5, 137.9, 136.7, 135.6, 135.1, 133.3, 129.5, 129.3, 127.8, 127.6, 127.1, 118.8, 79.5, 74.4, 73.9, 65.4, 61.8, 61.4, 60.9, 59.6, 57.3, 56.2, 52.9, 50.9, 28.5, 26.1, 18.6, 18.5, 1.4,  $-4.3$ ,  $-5.5$ ; IR (film)  $\nu_{\text{max}}$  2911, 1669, 1492, 1094, 832  $\text{cm}^{-1}$ ; ESI-TOF HRMS  $m/z$  864.2275 ( $\text{M}^+$  + H,  $\text{C}_{39}\text{H}_{52}\text{BrClN}_3\text{O}_{10}\text{Si}$  requires 864.2288).

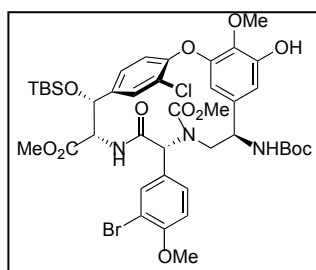

**Compound 17.** A solution of **15** (4.2 mg, 4.3  $\mu\text{mol}$ ) in THF (430  $\mu\text{L}$ ) was treated with dimethyldicarbonate (458  $\mu\text{L}$ , 4.3 mmol) and 4 N aqueous NaOH (215  $\mu\text{L}$ ) at 25  $^\circ\text{C}$  and the mixture was stirred for 0.5 h. After this time, the reaction mixture was quenched with the addition of saturated aqueous  $\text{NH}_4\text{Cl}$  (2 mL) and extracted with EtOAc. The organic layer was washed with  $\text{H}_2\text{O}$  and saturated aqueous NaCl, and dried ( $\text{Na}_2\text{SO}_4$ ). The solvent was removed under reduced pressure and the residue was purified by PTLC ( $\text{SiO}_2$ , 25% EtOAc–hexane) to provide **17** (4.0 mg, 91%) as a white film:  $[\alpha]_D^{25}$   $-104$  ( $c$  0.4,  $\text{CH}_3\text{OH}$ );  $^1\text{H}$  NMR ( $\text{CD}_3\text{OD}$ , 400 MHz) mixture of two rotamers (rotamer A:B = 3:1)  $\delta$  (for rotamer A) 7.78–7.73 (m, 1H), 7.60 (d,  $J$  = 8.4 Hz, 1H), 7.52 (s, 1H), 7.36 (d,  $J$  = 8.4 Hz, 1H), 7.30–7.23 (m, 1H), 7.16 (d,  $J$  = 8.4 Hz, 1H), 6.55 (s, 1H), 6.49–6.42 (m, 1H), 6.17 (br s, 1H), 5.64–5.57 (m, 1H), 5.61 (s, 1H), 5.05 (d,  $J$  = 9.2 Hz, 1H), 4.75–4.68 (m, 1H), 3.98 (s, 3H), 3.92 (s, 3H), 3.83 (s, 3H), 3.72–3.66 (m, 1H), 3.63 (s, 3H), 3.21–3.13 (m, 1H), 2.70–2.50 (br m, 1H), 1.37 (s, 9H), 1.06 (s, 9H), 0.79 (s, 9H), 0.27 (s, 3H), 0.24 (s, 3H), 0.03 (s, 3H),  $-0.04$  (s, 3H);  $^{13}\text{C}$  NMR ( $\text{CD}_3\text{OD}$ , 150 MHz) mixture of two rotamers (rotamer A:B = 3:1)  $\delta$  (for rotamer A) 170.9, 170.3, 158.4, 157.6, 156.9, 155.4, 152.6, 149.6, 140.1, 139.4, 134.3, 131.0, 129.8, 129.6, 129.5, 129.3, 127.2, 124.4, 79.6, 74.2, 61.4, 60.9, 56.3, 53.3, 52.9, 51.8, 28.2, 25.6, 18.7, 18.2,  $-4.8$ ,  $-4.9$ ,  $-5.0$ ,  $-6.1$ ; IR (film)  $\nu_{\text{max}}$

3310, 2944, 2832, 1664, 1449, 1117, 1019  $\text{cm}^{-1}$ ; ESI-TOF HRMS  $m/z$  1036.3193 ( $\text{M} + \text{H}^+$ ,  $\text{C}_{45}\text{H}_{67}\text{BrClN}_3\text{O}_{12}\text{Si}_2$  requires 1036.3208).

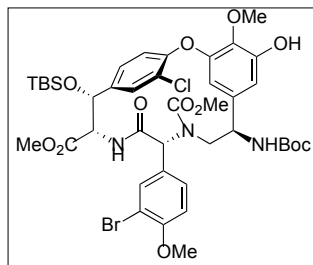

**Compound 18.** A solution of **17** (1.9 mg, 1.8  $\mu\text{mol}$ ) in anhydrous THF (180  $\mu\text{L}$ ) was treated with  $\text{Bu}_4\text{NF}$  (3.6  $\mu\text{L}$  of 1.0 M in THF, 3.6  $\mu\text{mol}$ ) and HOAc (3.6  $\mu\text{L}$ , 9.0  $\mu\text{mol}$ ) at 25  $^\circ\text{C}$ . The reaction mixture was stirred for 1 h. After this time, the reaction mixture was quenched with the addition of saturated aqueous  $\text{NaHCO}_3$  (1 mL) and extracted with EtOAc. The organic layer was washed with  $\text{H}_2\text{O}$  and saturated aqueous NaCl, and dried ( $\text{Na}_2\text{SO}_4$ ). The solvent was removed under reduced pressure and the residue was purified by PTLC ( $\text{SiO}_2$ , 50% EtOAc–hexane) to afford **18** (1.6 mg, 95%) as a white solid identical in all respects with authentic material ( $^1\text{H}$  NMR,  $\text{CDCl}_3$ ).<sup>23</sup>

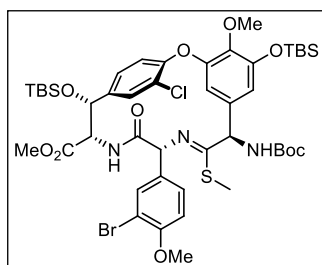

**Compound 20.** A solution of **13** (1.06 g, 1.05 mmol) and  $\text{K}_2\text{CO}_3$  (580 mg, 4.20 mmol) in acetone (30 mL) was treated with iodomethane (131 mL, 2.10 mmol) at room temperature and the mixture was stirred for 3 h. The solvent was removed under reduced pressure and the residue was purified by flash chromatography ( $\text{SiO}_2$ , 25–33% EtOAc–hexane gradient) followed by flash chromatography ( $\text{SiO}_2$ , 5% acetone– $\text{CH}_2\text{Cl}_2$ ) to provide **20** (787 mg, 73%; typically 73–94%) as a colorless solid: m.p. 138–142  $^\circ\text{C}$ ;  $[\alpha]_D^{25} +60$  ( $c$  0.41, MeOH);  $^1\text{H}$  NMR ( $\text{CD}_3\text{OD}$ , 600 MHz)  $\delta$  8.11 (d,  $J = 9.4$  Hz, 1H), 7.47 (d,  $J = 1.9$  Hz, 1H), 7.18 (dd,  $J = 1.9, 8.5$  Hz, 1H), 7.06 (d,  $J = 8.4$  Hz, 1H), 7.01–7.00 (m, 2H), 6.94 (dd,  $J = 1.6, 8.4$  Hz, 1H), 6.66 (dd,  $J = 1.9, 5.2$  Hz, 2H), 5.90 (d,  $J = 9.7$  Hz, 1H), 5.49 (d,  $J = 1.9$  Hz, 1H), 5.43–5.42 (m, 1H), 5.09 (s, 1H), 4.82 (dd,  $J = 2.2, 7.8$  Hz, 1H), 3.99 (s, 3H), 3.88 (s, 3H), 3.77 (s, 3H), 2.48 (s, 3H), 1.41 (s, 9H), 1.06 (s, 9H), 0.72 (s, 9H), 0.28 (s, 3H), 0.25 (s, 3H),  $-0.01$  (s, 3H),  $-0.18$  (s, 3H);  $^{13}\text{C}$  NMR ( $\text{CD}_3\text{OD}$ , 150 MHz)  $\delta$  173.0, 170.6, 169.3, 157.8, 157.2, 156.2, 155.0, 149.7, 143.4, 138.4, 136.8, 134.2, 130.6, 130.5, 128.5, 128.4, 127.8, 123.9, 118.9, 116.9, 113.3, 113.2, 80.8, 74.1, 68.7, 61.9, 60.9, 57.8, 56.9, 53.3, 49.7, 28.8, 26.4, 26.2, 19.4, 18.7, 14.8,  $-4.0$ ,  $-4.2$ ,  $-4.3$ ,  $-5.5$ ; IR (film)  $\nu_{\text{max}}$  3424, 2953, 2929, 2891, 2856, 1754, 1671, 1602, 1580, 1494, 1434, 1392, 1364, 1332, 1284, 1238, 1166, 1095, 1056, 1006  $\text{cm}^{-1}$ ; ESI-TOF HRMS  $m/z$  1022.2878 ( $\text{M}^+ + \text{H}$ ,  $\text{C}_{46}\text{H}_{65}\text{BrClN}_3\text{O}_{10}\text{SSi}_2$  requires 1022.2874).



127.1, 126.0, 124.2, 119.7, 117.0, 113.4, 112.0, 104.0, 98.4, 95.9, 79.7, 73.8, 72.5, 71.4, 70.4, 67.4, 66.4, 61.3, 59.7, 59.2, 58.8, 56.4, 55.7, 55.6, 53.1, 52.7, 28.6, 26.2, 19.0, 18.6, 15.0, -4.2, -4.32, -4.35, -5.2; IR (film)  $\nu_{\max}$  3413, 2931, 2890, 2857, 1712, 1681, 1605, 1582, 1495, 1469, 1433, 1393, 1363, 1321, 1237, 1201, 1157, 1095, 1060, 1045  $\text{cm}^{-1}$ ; ESI-TOF HRMS  $m/z$  1361.5531 ( $\text{M}^+ + \text{H}$ ,  $\text{C}_{68}\text{H}_{93}\text{ClN}_4\text{O}_{17}\text{SSi}_2$  requires 1361.5556).

For (*P*)-**22**:  $[\alpha]_{\text{D}}^{25} -92$  (*c* 0.23,  $\text{CHCl}_3$ );  $^1\text{H}$  NMR [acetone- $d_6$ , 600 MHz, rotamers (2:1)]  $\delta$  9.91 (br s, 0.33H), 9.50 (d,  $J = 8.0$  Hz, 0.66H), 7.89 (s, 0.33H), 7.77 (s, 0.33H), 7.58–6.93 (m, 11.33H), 6.82, 6.76, 6.70, 6.66, 6.64 and 6.57 (six s, 4H), 6.49–6.46 (m, 1H), 8.37 (d,  $J = 8.2$  Hz, 0.66H), 6.08 (br s, 0.33H), 6.01 (d,  $J = 8.4$  Hz, 0.33H), 5.71 (d,  $J = 8.4$  Hz, 0.66H), 5.64 (s, 0.33H), 5.60 (s, 0.66H), 5.42 (s, 1H), 5.35 (d,  $J = 5.6$  Hz, 0.33H), 5.32 (d,  $J = 12.2$  Hz, 0.33H), 5.23 (d,  $J = 12.2$  Hz, 0.33H), 4.92 (d,  $J = 12.0$  Hz, 0.33H), 4.88–4.84 (m, 0.66H), 4.71–4.69 (m, 0.33H), 4.65 ( $J = 11.9$  Hz, 0.5H), 4.59 ( $J = 11.9$  Hz, 0.5H), 4.48 (d,  $J = 6.5$  Hz, 0.66H), 4.41–4.38 (m, 1H), 4.28–4.25 (m, 1H), 3.92, 3.82, 3.81, 3.79, 3.75, 3.74, 3.71, 3.71, 3.69 and 3.60 (ten s, 15H), 3.48–3.29 (m, 6H), 3.24 and 3.21 (two s, 3H), 1.43 (s, 9H), 1.00 and 0.98 (two s, 9H), 0.89 and 0.79 (two s, 9H), 0.19, 0.12, 0.05, 0.00 and 0.13 (five s, 12H);  $^{13}\text{C}$  NMR [acetone- $d_6$ , 150 MHz, rotamers (2:1)]  $\delta$  202.2, 201.8, 171.3, 169.7, 169.1, 166.9, 161.6, 161.3, 160.1, 159.52, 159.47, 159.3, 157.8, 157.2, 155.8, 155.7, 153.33, 153.25, 152.3, 151.5, 150.5, 142.3, 141.5, 140.6, 140.4, 140.0, 139.8, 138.2, 138.0, 137.5, 137.1, 136.1, 132.7, 131.7, 130.6, 130.1, 129.4, 129.3, 129.2, 129.0, 128.8, 128.6, 127.8, 127.2, 126.9, 126.7, 125.42, 125.36, 124.2, 120.3, 119.8, 113.9, 112.9, 112.0, 107.9, 107.7, 104.3, 104.2, 98.8, 98.5, 95.5, 95.3, 79.9, 79.8, 75.5, 75.3, 72.54, 72.50, 67.6, 67.5, 67.3, 63.5, 62.2, 61.4, 61.0, 60.94, 60.86, 59.1, 58.8, 56.6, 56.4, 56.1, 55.9, 55.7, 55.6, 55.0, 53.3, 53.2, 52.8, 28.8, 28.7, 26.24, 26.18, 26.12, 26.07, 19.0, 18.9, 18.8, 18.7, -4.0, -4.21, -4.25, -4.27, -4.33, -5.0, -5.2; IR (film)  $\nu_{\max}$  3398, 3249, 2931, 2889, 2857, 1700, 1666, 1605, 1581, 1488, 1416, 1364, 1323, 1250, 1201, 1158, 1095, 1061, 1049, 1025  $\text{cm}^{-1}$ ; ESI-TOF HRMS  $m/z$  1347.5397 ( $\text{M}^+ + \text{H}$ ,  $\text{C}_{67}\text{H}_{91}\text{ClN}_4\text{O}_{17}\text{SSi}_2$  requires 1347.5399).

For (*M*)-**22**:  $[\alpha]_{\text{D}}^{25} -32$  (*c* 0.26,  $\text{CHCl}_3$ );  $^1\text{H}$  NMR [acetone- $d_6$ , 600 MHz, rotamers (1:1)]  $\delta$  9.05 (d,  $J = 6.5$  Hz, 0.5H), 7.85 (s, 0.5H), 7.61–7.19 (m, 11H), 6.81–6.64 (m, 4.5H), 6.55 (s, 0.5H), 6.51 (s, 0.5H), 6.42 (br s, 0.5H), 6.27 (d,  $J = 8.1$  Hz, 0.5H), 6.09 (br s, 0.5H), 6.03 (d,  $J = 8.0$  Hz, 0.5H), 5.69 (s, 0.5H), 5.57 (d,  $J = 8.0$  Hz, 0.5H), 5.51 (s, 0.5H), 5.46–5.41 (m, 1H), 5.02–4.97 (m, 2H), 4.80 (d,  $J = 11.9$  Hz, 0.5H), 4.71–4.70 (m, 0.5H), 4.65–4.62 (m, 1H), 4.49–4.48 (m, 0.5H), 4.39 (s, 1.5H), 3.97, 3.95, 3.82, 3.80, 3.74, 3.73, 3.71, 3.64 and 3.61 (nine s, 15H), 3.58–3.39 (m, 5.5H), 3.27 (s, 1.5H), 3.22 (s, 0.5H), 3.15 (s, 1.5H), 1.47 and 1.42 (two s, 9H), 1.05 and 1.03 (two s, 9H), 0.89 and 0.87 (two s, 9H), 0.26, 0.25 and 0.23 (three s, 6H), 0.07 and 0.05 (two s, 3H), -0.02 and -0.03 (two s, 3H);  $^{13}\text{C}$  NMR [acetone- $d_6$ , 150 MHz, rotamers (1:1)]  $\delta$  202.2, 201.8, 171.4, 169.8, 168.8, 167.2, 161.5, 161.1, 159.3, 159.2, 159.1, 158.3, 156.5, 156.2, 156.1, 156.0, 153.8, 153.7, 152.8, 152.1, 150.6, 150.4, 142.6, 142.3, 141.3, 140.2, 140.1, 139.6, 138.7, 138.6, 137.7, 137.0, 135.4, 133.9, 130.3, 129.9, 129.5, 129.4, 129.2, 128.78, 128.72, 128.6, 127.4, 127.3, 127.1, 126.7, 126.1, 125.2, 123.6, 119.8, 119.6, 115.9, 113.4, 112.5, 112.0, 109.3, 107.2, 104.7, 103.9, 98.48, 98.44, 96.7, 96.1, 80.2, 79.7, 75.7, 74.8, 72.9, 72.6, 71.6, 67.6, 67.1, 66.4, 66.3, 63.7, 62.7, 62.1, 61.2, 61.1, 61.0, 58.9, 58.9, 58.8, 56.5, 56.3, 56.0, 55.7, 55.6, 53.7, 53.3, 53.0, 52.8, 28.8, 28.7, 26.35, 26.29, 26.23, 26.21, 19.0, 19.0, 18.9, 18.7, -4.1, -4.2, -4.2, -4.3, -4.8, -5.3; IR (film)  $\nu_{\max}$  3249, 2930, 2887, 2857, 1700, 1665, 1604, 1580, 1490, 1415, 1365, 1321, 1236, 1200, 1158, 1095, 1063, 1048, 1025  $\text{cm}^{-1}$ ; ESI-TOF HRMS  $m/z$  1347.5381 ( $\text{M}^+ + \text{H}$ ,  $\text{C}_{67}\text{H}_{91}\text{ClN}_4\text{O}_{17}\text{SSi}_2$  requires 1347.5399).



### Thermal Equilibration of (*M*)-**22**

A solution of (*M*)-**22** (345 mg, 0.256 mmol) in *o*-dichlorobenzene (2.5 mL, filtered through basic Al<sub>2</sub>O<sub>3</sub>) under Ar was placed into a 20 mL microwave reactor vial. The vial was loaded into a microwave reactor (Biotage Initiator) and warmed at 160 °C for 30 min. The mixture was cooled and the compounds were purified by flash chromatography (SiO<sub>2</sub>, 50% EtOAc–hexane) followed by PTLC (SiO<sub>2</sub>, 4% acetone–CH<sub>2</sub>Cl<sub>2</sub> for (*P*)-**22**) and (SiO<sub>2</sub>, 3% CH<sub>3</sub>OH–CH<sub>2</sub>Cl<sub>2</sub> for (*M*)-**22**) to provide (*P*)-**22** (181 mg, 53%) and (*M*)-**22** (138 mg, 40%) as colorless foams.

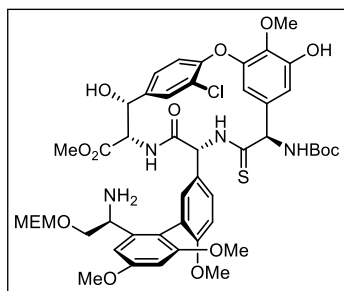

**Compound 24.** A solution of Pd(OAc)<sub>2</sub> (9.6 mg, 0.045 mmol) and *N*-methylmorpholine (distilled, 14.4 μL, 0.131 mmol) in CH<sub>2</sub>Cl<sub>2</sub> (480 μL, distilled over P<sub>2</sub>O<sub>5</sub>) was treated with Et<sub>3</sub>SiH (144 μL, 0.902 mmol) at 25 °C. The mixture was stirred for 15 min and then added to a solution of (*P*)-**22** (118 mg, 0.088 mmol) in CH<sub>2</sub>Cl<sub>2</sub> (360 μL). This protocol was repeated for a second 118 mg of (*P*)-**22** and the batches were later combined for work-up. The reaction mixtures were vigorously stirred at room temperature for 24 h, at which point the solution was diluted with CH<sub>2</sub>Cl<sub>2</sub> and filtered through Celite. The filtrate was added to saturated aqueous NH<sub>4</sub>Cl (2 mL), stirred for 2 h and extracted with CH<sub>2</sub>Cl<sub>2</sub>. The organic layer was washed with H<sub>2</sub>O and saturated aqueous NaCl, and dried (Na<sub>2</sub>SO<sub>4</sub>). The solvent was removed under reduced pressure and the residue was purified by flash chromatography (SiO<sub>2</sub>, 5% acetone–CH<sub>2</sub>Cl<sub>2</sub>, then 10% CH<sub>3</sub>OH–CH<sub>2</sub>Cl<sub>2</sub>) to provide **23** (ca. 205 mg) as a colorless solid. A solution of **23** in anhydrous THF (2 mL) and acetic acid (76.5 μL, 1.34 mmol, 8.0 equiv) was treated with Bu<sub>4</sub>NF (1.0 M in THF, 1.03 mL, 1.03 mmol) at room temperature for 3 h. The reaction mixture was quenched with the addition of saturated aqueous NaHCO<sub>3</sub> and extracted with EtOAc. The organic layer was washed with H<sub>2</sub>O, saturated aqueous NaCl, and dried (Na<sub>2</sub>SO<sub>4</sub>). The solvent was removed under reduced pressure and the residue was purified by flash chromatography (SiO<sub>2</sub>, 5–15% *i*-PrOH–CH<sub>2</sub>Cl<sub>2</sub> gradient) followed by PTLC (SiO<sub>2</sub>, 8% CH<sub>3</sub>OH–CH<sub>2</sub>Cl<sub>2</sub>) to afford **24** (129 mg, 75%, 2 steps; typically 75–88%) as a colorless solid.

For **23**: [α]<sub>D</sub><sup>25</sup> +18 (*c* 0.39, CHCl<sub>3</sub>); <sup>1</sup>H NMR (CD<sub>3</sub>OD, 600 MHz, rotamers (4:1), major given) δ 7.50 (d, *J* = 1.5 Hz, 1H), 7.47 (dd, *J* = 2.1, 8.4 Hz, 1H), 7.13 (d, *J* = 8.4 Hz, 1H), 6.90 (br s, 1H), 6.74 (d, *J* = 2.0 Hz, 1H), 6.70 (d, *J* = 2.0 Hz, 1H), 6.66 (br s, 1H), 6.48 (d, *J* = 2.0 Hz, 1H), 6.28 (d, *J* = 1.9 Hz, 1H), 6.22 (br s, 1H), 5.67 (br s, 1H), 5.48 (d, *J* = 2.0 Hz, 1H), 5.22 (s, 1H), 4.89 (s, 1H), 4.46 (*J* = 6.7 Hz, 1H), 4.38 (*J* = 6.7 Hz, 1H), 3.95–3.93 (m, 1H), 3.84 (s, 3H), 3.82 (s, 3H), 3.75 (s, 3H), 3.62 (s, 3H), 3.61 (s, 3H), 3.50–3.41 (m, 5H), 3.32 (s, 3H), 3.19–3.16 (m, 1H), 1.42 (s, 9H), 1.06 (s, 9H), 0.87 (s, 9H), 0.23 (s, 3H), 0.20 (s, 3H), 0.06 (s, 3H), –0.12 (s, 3H); <sup>13</sup>C NMR (CD<sub>3</sub>OD, 150 MHz, rotamers (4:1), major given) δ 201.8, 170.7, 170.1, 162.2, 159.8, 159.8, 157.7, 154.8, 154.0, 150.8, 143.0, 140.5, 139.3, 135.1, 132.9, 129.8, 129.7, 128.6, 128.1, 127.2, 126.2, 124.6, 119.9, 117.2, 112.6, 110.5, 103.9, 98.6, 96.3, 81.6, 74.6, 73.0, 73.0, 67.8, 62.7, 61.7, 61.3, 59.2, 56.6, 56.1, 56.0, 53.4, 52.4, 49.5, 28.8, 26.6, 26.4, 19.4, 19.0, –3.8, –4.2, –4.3, –5.3; IR (film) ν<sub>max</sub> 3246, 2930, 2889, 2856, 1700, 1667, 1604, 1581, 1489, 1463, 1417, 1365, 1324,

1250, 1239, 1203, 1158, 1096, 1061, 1048, 1009  $\text{cm}^{-1}$ ; ESI-TOF HRMS  $m/z$  1213.5011 ( $\text{M}^+ + \text{H}$ ,  $\text{C}_{59}\text{H}_{85}\text{ClN}_4\text{O}_{15}\text{SSi}_2$  requires 1213.5032).

For **24**: m.p. 172 °C (decomposition);  $[\alpha]_{\text{D}}^{25} +87$  ( $c$  0.21,  $\text{CHCl}_3$ );  $^1\text{H}$  NMR ( $\text{CD}_3\text{OD}$ , 600 MHz)  $\delta$  7.45 (d,  $J = 2.0$  Hz, 1H), 7.38 (dd,  $J = 2.3, 8.5$  Hz, 1H), 7.27 (d,  $J = 7.9$  Hz, 1H), 7.06 (d,  $J = 8.5$  Hz, 1H), 6.72 (d,  $J = 2.2$  Hz, 1H), 6.61 (d,  $J = 2.0$  Hz, 1H), 6.50 (d,  $J = 2.3$  Hz, 1H), 6.49 (br s, 1H), 6.35 (br s, 1H), 5.75 (s, 1H), 6.65 (br s, 1H), 5.39 (d,  $J = 3.5$  Hz, 1H), 5.22 (s, 1H), 5.02 (d,  $J = 3.5$  Hz, 1H), 4.46 ( $J = 6.7$  Hz, 1H), 4.40 (d,  $J = 6.7$  Hz, 1H), 3.87 (dd,  $J = 3.3, 9.0$  Hz, 1H), 3.85 (s, 3H), 3.79 (s, 3H), 3.78 (s, 3H), 3.74 (s, 3H), 3.65 (s, 3H), 3.51–3.43 (m, 4H), 3.38 (dd,  $J = 10.2, 3.3$  Hz, 1H), 3.20–3.17 (m, 1H), 1.42 (s, 9H);  $^{13}\text{C}$  NMR ( $\text{CD}_3\text{OD}$ , 150 MHz)  $\delta$  202.4, 171.3, 171.0, 162.3, 159.8, 159.6, 157.6, 154.6, 153.1, 152.6, 142.2, 140.5, 138.9, 135.2, 131.8, 130.4, 129.5, 128.6, 128.0, 127.0, 126.9, 124.9, 120.3, 112.3, 111.7, 106.5, 103.6, 98.4, 96.2, 81.5, 73.0, 72.8, 72.7, 67.9, 63.1, 61.7, 60.7, 59.2, 56.24, 56.15, 56.0, 53.2, 52.8, 49.7, 28.8; IR (film)  $\nu_{\text{max}}$  3257, 2934, 2838, 1698, 1671, 1603, 1585, 1489, 1455, 1430, 1366, 1324, 1235, 1201, 1156, 1057, 1029  $\text{cm}^{-1}$ ; ESI-TOF HRMS  $m/z$  985.3294 ( $\text{M}^+ + \text{H}$ ,  $\text{C}_{47}\text{H}_{57}\text{ClN}_4\text{O}_{15}\text{S}$  requires 985.3302).

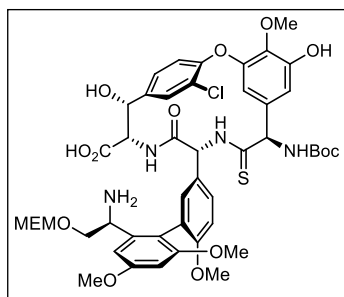

**Compound 25.** A solution of **24** (150 mg, 0.152 mmol) in *t*-BuOH (3.6 mL) and  $\text{H}_2\text{O}$  (1.8 mL) was treated with  $\text{LiOH}\cdot\text{H}_2\text{O}$  (13.8 mg, 0.329 mmol) at 0 °C and stirred at 0 °C for 2 h. The reaction mixture was quenched with the addition of saturated aqueous  $\text{NH}_4\text{Cl}$  (2 mL) and extracted with EtOAc. The organic layer was washed with  $\text{H}_2\text{O}$  and saturated aqueous  $\text{NaCl}$ , and dried ( $\text{Na}_2\text{SO}_4$ ). The solvent was removed under reduced pressure and the residue was purified by PTLC ( $\text{SiO}_2$ , 7%  $\text{CH}_3\text{OH}\text{--}\text{CH}_2\text{Cl}_2$ ) to afford **25** (129 mg, 87%; typically 87–95%) as a colorless solid: m.p. 165 °C (decomposition);  $[\alpha]_{\text{D}}^{25} +42$  ( $c$  0.12,  $\text{CHCl}_3$ );  $^1\text{H}$  NMR ( $\text{CD}_3\text{OD}$ , 600 MHz, rotamers (1:1))  $\delta$  7.57 (br s, 0.5H), 7.54 (s, 0.5H), 7.44 (d,  $J = 8.3$  Hz, 0.5 Hz), 7.41 (s, 0.5H), 7.37 (br s), 7.30 (d,  $J = 8.3$  Hz, 0.5H), 7.23 (d,  $J = 8.0$  Hz, 0.5H), 7.18 (s, 0.5H), 7.05 (d,  $J = 6.8$  Hz, 0.5H), 7.00 (d,  $J = 8.5$  Hz, 0.5H), 6.96 (d,  $J = 8.7$  Hz, 0.5H), 6.80 (d,  $J = 2.0$  Hz, 0.5H), 6.78 (d,  $J = 2.0$  Hz, 0.5H), 6.66 (br s, 1.5H), 6.62 (d,  $J = 2.1$  Hz, 0.5H), 6.43 (d,  $J = 9.7$  Hz, 0.5H), 6.40 (s, 0.5H), 6.18 (br s, 0.5H), 5.73 (br s, 0.5H), 5.69 (br s, 0.5H), 5.42 (d,  $J = 4.1$  Hz, 0.5H), 5.40 (s, 0.5H), 5.32 (s, 0.5H), 5.19 (s, 0.5H), 4.70 ( $J = 7.0$  Hz, 0.5H), 4.69 ( $J = 7.0$  Hz, 0.5H), 4.60 ( $J = 6.6$  Hz, 0.5H), 4.57 ( $J = 6.6$  Hz, 0.5H), 4.43 (d,  $J = 4.2$  Hz, 0.5H), 4.22 (s, 0.5H), 4.20–4.18 (m, 0.5H), 4.05–4.03 (m, 0.5H), 3.99 (s, 1.5H), 3.98 (s, 1.5H), 3.88 (s, 1.5H), 3.86 (s, 1.5H), 3.82–3.79 (m, 1H), 3.72 (s, 1.5H), 3.70 (s, 1H), 3.67 (s, 1.5H), 3.66 (s, 1.5H), 3.65–3.42 (m, 5H), 3.35 (s, 1.5H), 3.33 (s, 1.5H), 1.49 (s, 4.5H), 1.48 (s, 4.5H);  $^{13}\text{C}$  NMR ( $\text{CD}_3\text{OD}$ , 150 MHz, rotamers (1:1))  $\delta$  205.7, 203.8, 175.7, 174.7, 172.1, 170.5, 162.5, 160.4, 160.2, 159.2, 158.7, 157.7, 157.4, 157.3, 154.4, 153.7, 152.4, 152.3, 151.4, 143.1, 142.4, 137.9, 137.8, 137.5, 136.7, 136.2, 136.00, 135.97, 135.4, 132.9, 130.0, 129.6, 129.1, 129.0, 128.6, 128.4, 128.3, 127.6, 127.5, 127.2, 126.3, 125.2, 125.1, 124.9, 121.3, 112.8, 112.0, 108.9, 108.8, 105.7, 105.1, 104.0, 103.7, 100.5, 100.0, 96.8, 96.5, 81.3, 81.2, 74.5, 74.3, 73.01, 72.99, 72.8, 70.0, 69.6, 68.5, 68.4, 66.0,

63.6, 63.4, 63.1, 62.4, 62.3, 61.6, 61.5, 59.7, 59.29, 59.27, 56.7, 56.4, 56.25, 56.21, 56.18, 56.16, 53.2, 53.1, 50.0, 49.7, 29.0, 28.9; IR (film)  $\nu_{\max}$  3246, 2927, 2889, 2832, 1699, 1655, 1603, 1583, 1488, 1458, 1424, 1366, 1325, 1288, 1234, 1201, 1157, 1057, 1030  $\text{cm}^{-1}$ ; ESI-TOF HRMS  $m/z$  971.3157 ( $\text{M}^+ + \text{H}$ ,  $\text{C}_{46}\text{H}_{55}\text{ClN}_4\text{O}_{15}\text{S}$  requires 971.3146).

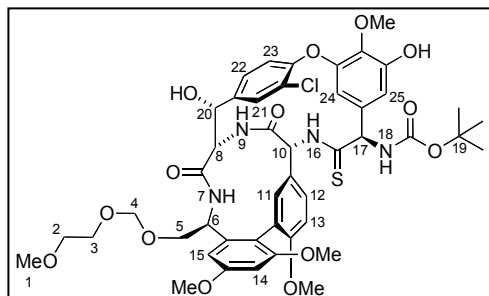

**Compound 26.** A solution of **25** (43 mg, 0.107 mmol) and *N*-methylmorpholine (57  $\mu\text{L}$ , 0.535 mmol, 5 equiv) in THF (20 mL) was treated with DEPBT (157 mg, 0.535 mmol, 5 equiv) at 0  $^{\circ}\text{C}$ . The reaction mixture was allowed to warm to room temperature and stirred for 17 h. The solvent was removed under reduced pressure and the residue was purified by flash chromatography ( $\text{SiO}_2$ , 2–10% MeOH– $\text{CH}_2\text{Cl}_2$  gradient) followed by PTLC ( $\text{SiO}_2$ , 100% EtOAc) to afford **25** (32 mg, 76%) as a colorless solid: m.p. 195  $^{\circ}\text{C}$  (decomposition);  $[\alpha]_{\text{D}}^{25}$   $-30$  ( $c$  0.22,  $\text{CHCl}_3$ );  $^1\text{H}$  NMR ( $\text{CD}_2\text{Cl}_2$ , 600 MHz)  $\delta$  7.34 (dd,  $J = 1.6, 8.3$  Hz,  $\text{C}_{22}\text{-H}$ ); 7.31 (s,  $\text{C}_{21}\text{-H}$ ), 7.23 (dd,  $J = 2.1, 8.6$  Hz,  $\text{C}_{12}\text{-H}$ ), 7.20 (br s,  $\text{N}_9\text{-H}$ ), 7.05 (s,  $\text{C}_{13}\text{-H}$ ), 7.03 (dd,  $J = 2.2, 2.2$  Hz,  $\text{C}_{11}\text{-H}$ ), 6.81–6.80 (m,  $\text{C}_{25}\text{-H}$ ), 6.74 (d,  $J = 2.0$  Hz,  $\text{C}_{15}\text{-H}$ ), 6.59 (d,  $J = 2.0$  Hz,  $\text{C}_{14}\text{-H}$ ), 6.40 (br s,  $\text{C}_{17}\text{-H}$ ), 6.20 (d,  $J = 7.0$  Hz,  $\text{N}_7\text{-H}$ ), 6.09 (s,  $\text{N}_{16}\text{-H}$ ), 5.90 (d,  $J = 9.8$  Hz,  $\text{N}_{18}\text{-H}$ ), 5.76 (br s,  $\text{C}_{23}\text{-H}$ ), 5.59 (s,  $\text{C}_{20}\text{-H}$ ), 5.29 (d,  $J = 6.2$  Hz,  $\text{C}_{10}\text{-H}$ ), 5.09 (s,  $\text{C}_{24}\text{-H}$ ), 4.75 (d,  $J = 6.8$  Hz,  $\text{C}_4\text{-H}_a$ ), 4.68 (d,  $J = 6.8$  Hz,  $\text{C}_4\text{-H}_b$ ), 4.43 (dd,  $J = 8.6, 8.6$  Hz,  $\text{C}_5\text{-H}_a$ ), 4.26 (br s, OH), 4.08 (s, OMe), 4.05–4.03 (m,  $\text{C}_5\text{-H}_b$ ,  $\text{C}_8\text{-H}$ ), 4.00–3.97 (m,  $\text{C}_6\text{-H}$ ), 3.89 (s, OMe), 3.77 (s, OMe), 3.74 (s, OMe), 3.71–3.67 (m,  $\text{C}_3\text{-H}_a$ ), 3.62–3.56 (m,  $\text{C}_3\text{-H}_b$ ,  $\text{C}_2\text{-H}_a$ ,  $\text{C}_2\text{-H}_b$ ), 3.37 (s, OMe), 1.49 (s, *t*Bu);  $^{13}\text{C}$  NMR ( $\text{CD}_2\text{Cl}_2$ , 150 MHz)  $\delta$  203.8 (s, C=S), 173.3 (s), 166.3 (s), 160.7 (s), 158.8 (s), 157.9 (s), 156.3 (s), 152.0 (s), 150.8 (s), 150.0 (s), 141.0 (s), 138.4 (s), 137.4 (s), 136.0 (d,  $\text{C}_{11}$ ), 135.1 (s), 128.1 (s), 127.7 (d,  $\text{C}_{21}$ ), 127.2 (d,  $\text{C}_{22}$ ), 126.8 (s), 126.8 (d,  $\text{C}_{12}$ ), 125.6 (s), 124.5 (d,  $\text{C}_{23}$ ), 120.8 (s), 113.4 (d,  $\text{C}_{13}$ ), 106.8 (d,  $\text{C}_{25}$ ), 106.6 (d,  $\text{C}_{15}$ ), 103.4 (d,  $\text{C}_{24}$ ), 98.0 (d,  $\text{C}_{14}$ ), 95.9 (t,  $\text{C}_{14}$ ), 81.1 (s,  $\text{C}_{19}$ ), 72.3 (t,  $\text{C}_2$ ), 71.8 (d,  $\text{C}_{20}$ ), 67.6 (t,  $\text{C}_5$ ), 67.4 (t,  $\text{C}_3$ ), 66.4 (d,  $\text{C}_8$ ), 61.8 (q, OMe), 61.4 (d,  $\text{C}_{17}$ ), 59.6 (q, OMe), 59.6 (d,  $\text{C}_{10}$ ), 56.7, 56.4, and 56.0 (three q, three OMe), 53.6 (d,  $\text{C}_6$ ), 28.7 (q, *t*Bu); IR (film)  $\nu_{\max}$  3247, 2975, 2933, 2837, 1667, 1604, 1582, 1503, 1486, 1425, 1367, 1320, 1234, 1199, 1158, 1084, 1059, 1024  $\text{cm}^{-1}$ ; ESI-TOF HRMS  $m/z$  953.3030 ( $\text{M}^+ + \text{H}$ ,  $\text{C}_{46}\text{H}_{53}\text{ClN}_4\text{O}_{14}\text{S}$  requires 953.3046). The 2D  $^1\text{H}$ - $^1\text{H}$  ROESY spectrum ( $\text{CD}_2\text{Cl}_2$ , 600 MHz) displayed the following diagnostic NOE crosspeaks:  $\text{C}_8\text{-H}/\text{C}_{10}\text{-H}$ ,  $\text{C}_8\text{-H}/\text{C}_{11}\text{-H}$ ,  $\text{C}_{11}\text{-H}/\text{C}_8\text{-H}$ ,  $\text{C}_{21}\text{-H}/\text{C}_{20}\text{-H}$ ,  $\text{C}_{21}\text{-H}/\text{C}_8\text{-H}$ ,  $\text{C}_{15}\text{-H}/\text{C}_5\text{-H}_a$ ,  $\text{N}_7\text{-H}/\text{C}_6\text{-H}$ ,  $\text{C}_{15}\text{-H}/\text{C}_8\text{-H}$ ,  $\text{C}_8\text{-H}/\text{C}_5\text{-H}_b$ ,  $\text{N}_{18}\text{-H}/\text{C}_{25}\text{-H}$ ,  $\text{C}_3\text{-H}_a/\text{C}_2\text{-H}_b$ . The single crystal x-ray structure of **26** (CDCC 837960) was solved using a parallelepiped-shaped crystal grown from acetone and hexanes confirming its structure, stereochemistry, and conformation.

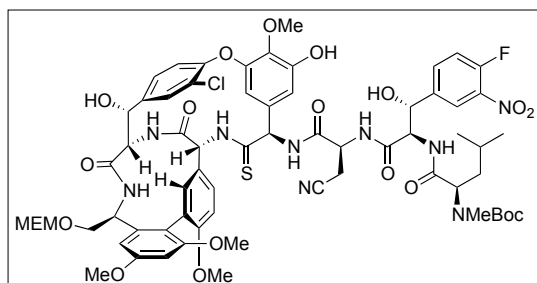

**Compound 29.** A solution of **26** (16.5 mg, 0.017 mmol) in anhydrous  $\text{CH}_2\text{Cl}_2$  (0.2 mL) was treated with  $\text{HCO}_2\text{H}$  (99+%, 0.2 mL) and stirred at 25 °C for 12 h. The reaction mixture was diluted with  $\text{CH}_2\text{Cl}_2$  (2 mL) and the solvent was removed under a stream of  $\text{N}_2$ . The residue was dissolved in EtOAc (2 mL) and treated with saturated aqueous  $\text{NaHCO}_3$ . The layers were separated and the aqueous phase was extracted with EtOAc ( $2 \times 3$  mL). The combined organic phases were washed with saturated aqueous NaCl ( $1 \times 2$  mL), dried ( $\text{Na}_2\text{SO}_4$ ), and the solvent was removed under reduced pressure to give the crude free amine **27** (14.5 mg, 98%) that was carried forward without purification.

A solution of **27** (14.5 mg, 0.017 mmol) and **28** (12.5 mg, 0.022 mmol, 1.3 equiv) in anhydrous THF (50  $\mu\text{L}$ ) at 0 °C was treated sequentially with *i*- $\text{Pr}_2\text{NEt}$  (12  $\mu\text{L}$ , 0.069 mmol, 4.0 equiv) and a solution of T3P (25.5 mg, 50% in EtOAc, 0.040 mmol, 2.4 equiv) in THF (50  $\mu\text{L}$ ), and the reaction mixture was stirred at 0 °C for 30 min. The reaction was quenched by addition of saturated aqueous  $\text{NH}_4\text{Cl}$  (1 mL) and the aqueous phase was extracted with EtOAc ( $3 \times 1$  mL). The combined organic phases were washed with saturated aqueous NaCl ( $1 \times 2$  mL), dried ( $\text{Na}_2\text{SO}_4$ ), and the solvent was removed under reduced pressure. PTLC ( $\text{SiO}_2$ , 10%  $\text{CH}_3\text{OH}-\text{CH}_2\text{Cl}_2$ ) afforded **29** (12.8 mg, 54%; typically 52–56%) as a white solid:  $[\alpha]_D^{25} +19$  ( $c$  0.1,  $\text{CHCl}_3$ );  $^1\text{H}$  NMR ( $\text{CD}_3\text{OD}$ , 600 MHz)  $\delta$  8.10 (dd,  $J = 6.0, 1.9$  Hz, 1H), 7.74–7.68 (m, 1H), 7.57 (d,  $J = 1.9$  Hz, 1H), 7.42 (dd,  $J = 6.0, 1.9$  Hz, 1H), 7.18 (br s, 1H), 7.10 (dd,  $J = 6.0, 2.0$  Hz, 1H), 6.98 (d,  $J = 5.9$  Hz, 1H), 6.92 (d,  $J = 2.1$  Hz, 1H), 6.65 (d,  $J = 1.9$  Hz, 1H), 6.61 (d,  $J = 2.0$  Hz, 1H), 6.56 (s, 1H), 6.49 (br s, 1H), 5.23 (br s, 1H), 5.22 (s, 1H), 5.16 (s, 1H), 4.97–4.85 (m, 3H), 4.76 (s, 2H), 4.74–4.64 (m, 1H), 4.58–4.43 (m, 2H), 4.37 (dd,  $J = 7.8, 4.3$  Hz, 1H), 4.17 (br s, 1H), 4.06 (dd,  $J = 7.8, 4.2$  Hz, 1H), 3.89 (s, 3H), 3.70 (s, 3H), 3.66 (br s, 3H), 3.58 (t,  $J = 5.1$  Hz, 1H), 3.37 (s, 3H), 3.21–3.13 (m, 1H), 2.98–2.89 (m, 1H), 2.52 (br s, 3H), 1.63–1.35 (m, 3H), 1.43 (s, 9H), 0.90–0.79 (m, 6H);  $^{13}\text{C}$  NMR ( $\text{CD}_3\text{OD}$ , 150 MHz)  $\delta$  204.0, 173.1, 172.2, 171.8, 169.7, 169.6, 161.7, 160.2, 158.7, 157.0, 155.2, 153.4, 152.4, 151.3, 142.6, 140.0, 139.4, 138.3, 136.9, 135.6, 128.9, 128.7, 128.4, 128.0, 127.2, 125.7, 124.7, 122.8, 119.3, 119.2, 118.5, 113.5, 109.2, 106.8, 104.8, 98.9, 96.8, 82.1, 81.6, 73.2, 72.9, 71.5, 68.5, 68.3, 64.9, 61.4, 61.2, 59.2, 56.7, 56.2, 56.0, 53.1, 51.2, 49.9, 38.0, 30.7, 30.3, 28.6 (3C), 26.9, 26.0, 23.74, 23.73, 21.9, 20.9; ESI-TOF HRMS  $m/z$  1402.4750 ( $\text{M}^+ + \text{H}$ ,  $\text{C}_{66}\text{H}_{77}\text{ClFN}_9\text{O}_{20}\text{S}$  requires 1402.4751).

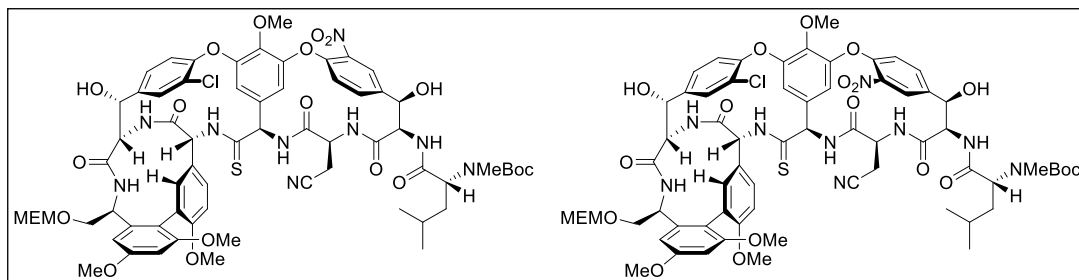

**Compound 30.** A solution of **29** (12.8 mg, 9.1  $\mu\text{mol}$ ) in anhydrous DMSO (1.8 mL) was treated with  $\text{Cs}_2\text{CO}_3$  (12.1 mg, 37.1  $\mu\text{mol}$ , 4.1 equiv) at 25 °C under Ar and allowed to stir for 12 h. The reaction mixture was cooled to 0 °C and quenched by the addition of 0.2 N HCl (4 mL) and the aqueous phase was extracted with EtOAc (2  $\times$  3 mL). The combined organic phases were washed with saturated aqueous NaCl (5 mL), dried ( $\text{Na}_2\text{SO}_4$ ), and the solvent was removed under reduced pressure. PTLC ( $\text{SiO}_2$ , 7%  $\text{CH}_3\text{OH}$ -EtOAc) afforded (*P*)-**30** (8.3 mg, 66%) as a white solid and its atropisomer (*M*)-**30** (1.1 mg, 9%) as a white solid.

For (*P*)-**30**:  $[\alpha]_{\text{D}}^{25} +30$  (*c* 0.2,  $\text{CHCl}_3$ );  $^1\text{H}$  NMR ( $\text{CD}_3\text{OD}$ , 600 MHz)  $\delta$  8.11 (d,  $J = 8.6$  Hz, 1H), 8.00–7.94 (m, 1H), 7.59 (br s, 1H), 7.53 (d,  $J = 7.9$  Hz, 1H), 7.42 (d,  $J = 8.5$  Hz, 1H), 7.17 (d,  $J = 2.1$  Hz, 1H), 7.06–6.98 (m, 1H), 6.96 (d,  $J = 8.6$  Hz, 1H), 6.95–6.92 (m, 1H), 6.91 (d,  $J = 2.0$  Hz, 1H), 6.64 (d,  $J = 2.1$  Hz, 1H), 6.32 (br s, 1H), 5.70 (s, 1H), 5.47 (d,  $J = 6.6$  Hz, 1H), 5.34 (s, 1H), 5.23 (s, 1H), 5.17 (s, 1H), 4.90–4.76 (m, 2H, obscured by  $\text{H}_2\text{O}$ ), 4.76 (s, 2H), 4.36 (dd,  $J = 7.8$ , 4.1 Hz, 1H), 4.16 (s, 1H), 4.14 (s, 3H), 4.05 (dd,  $J = 10.2$ , 10.2 Hz, 1 H), 3.93 (dd,  $J = 10.1$ , 4.3 Hz, 1 H), 3.89 (s, 3H), 3.77–3.71 (m, 2H), 3.69 (s, 3H), 3.64 (s, 3H), 3.58 (t,  $J = 4.5$  Hz, 2H), 3.37 (s, 3H), 2.87–2.84 (m, 1H), 2.83 (br s, 3H), 2.72 (dd,  $J = 16.9$ , 7.8 Hz, 1H), 1.89–1.81 (m, 1H), 1.67–1.47 (m, 2H), 1.53 (s, 9H), 1.04–0.87 (m, 6H);  $^{13}\text{C}$  NMR ( $\text{CD}_3\text{OD}$ , 125 MHz)  $\delta$  201.5, 173.1, 170.6, 169.9, 168.5, 168.2, 160.7, 159.2, 157.8, 153.3, 150.0, 148.5, 143.7, 141.8, 139.3, 138.5, 137.4, 137.3, 135.7, 133.1, 127.9, 127.7, 127.1, 126.9, 126.3, 126.0, 124.7, 124.4, 123.9, 121.8, 116.6, 112.7, 106.4, 106.1, 105.8, 98.0, 95.8, 81.1, 72.2, 71.9, 71.0, 67.5, 67.3, 63.9, 61.1, 60.3, 59.9, 58.2, 56.3, 55.6, 55.3, 55.0, 52.1, 51.5, 48.9, 35.9, 31.1, 29.7, 28.6, 27.8 (3C), 24.8, 22.9, 20.8, 20.2; ESI-TOF HRMS  $m/z$  1404.4472 ( $\text{M}^+ + \text{Na}$ ,  $\text{C}_{66}\text{H}_{76}\text{ClN}_9\text{O}_{20}\text{SNa}$  requires 1404.4508).

For (*M*)-**30**:  $[\alpha]_{\text{D}}^{25} +38$  (*c* 0.22, MeOH);  $^1\text{H}$  NMR ( $\text{CD}_3\text{OD}$ , 600 MHz)  $\delta$  8.42 (s, 1H), 8.30 (br s, 1H), 7.65–7.55 (m, 2H), 7.55–7.31 (m, 1H), 7.19 (s, 1H), 7.10–6.81 (m, 3H), 6.63 (m, 2H), 5.87 (br s, 1H), 5.52 (br s, 1H), 5.38–5.25 (m, 2H), 5.16 (br s, 1H), 4.85–4.78 (m, 2H), 4.77 (s, 2H), 4.37 (br s, 1H), 4.19 (br s, 1H), 4.13 (s, 3H), 4.12–4.06 (m, 1H), 3.95 (br s, 1H), 3.87 (s, 3H), 3.80–3.61 (m, 4H), 3.58 (s, 3H), 3.54 (s, 3H), 3.38 (s, 3H), 2.91–2.85 (m, 1H), 2.84 (br s, 1H), 1.89–1.78 (m, 1H), 1.55 (s, 9H), 1.05–0.85 (m, 6H);  $^{13}\text{C}$  NMR ( $\text{CD}_3\text{OD}$ , 125 MHz)  $\delta$  201.9, 174.3, 171.1, 170.2, 168.8, 161.4, 159.6, 158.3, 158.2, 156.9, 153.9, 150.2, 147.5, 144.0, 142.5, 140.1, 138.9, 137.8, 137.5, 135.5, 132.8, 128.3, 127.9, 127.7, 127.3, 126.8, 126.4, 126.1, 125.1, 124.2, 123.8, 122.2, 117.1, 114.3, 113.1, 106.3, 106.0, 98.5, 96.3, 81.6, 72.7, 72.4, 67.9, 67.7, 64.3, 61.2, 61.0, 60.8, 58.7, 56.6, 56.2, 55.7, 55.5, 54.3, 52.5, 51.8, 36.2, 30.21, 30.15, 28.3 (3C), 25.3, 23.3, 21.2; ESI-TOF HRMS  $m/z$  1382.4681 ( $\text{M}^+ + \text{H}$ ,  $\text{C}_{66}\text{H}_{77}\text{ClN}_9\text{O}_{20}\text{S}$  requires 1382.4688).

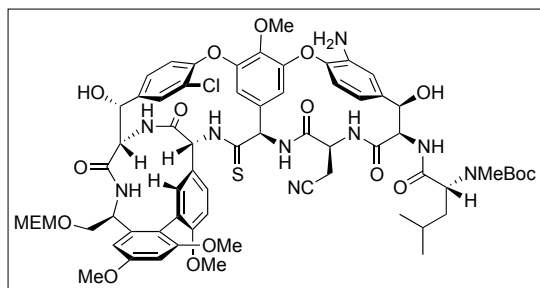

**Compound 31.** A solution of **30** (36.2 mg, 26.2  $\mu\text{mol}$ ) in 500  $\mu\text{L}$  degassed acetone was treated with 100  $\mu\text{L}$  degassed saturated aqueous  $\text{NH}_4\text{Cl}$  and zinc nano particles (68 mg, 1.05 mmol, 40 equiv). The reaction mixture was stirred at 25  $^\circ\text{C}$  under Ar for 4 h before the solvent was removed under a stream of  $\text{N}_2$ . The residue was dissolved in EtOAc and purified by passage through a short plug of silica gel (10%  $\text{CH}_3\text{OH}-\text{CH}_2\text{Cl}_2$ ) to give **31** (32.2 mg, 91%; typically 75–94%) as a white solid that was carried forward to the next step without further purification or characterization.

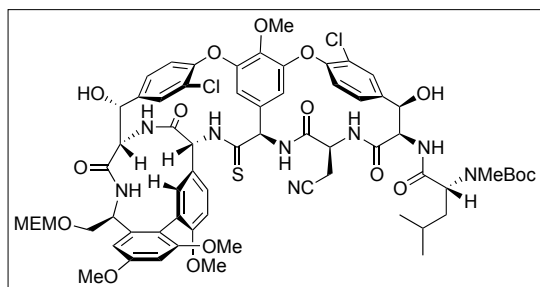

**Compound 32.** The reaction was performed on scales ranging from 6.5–10.0 mg (47–63%, 3.1–5.1 mg); a representative procedure follows: A solution of **31** (6.9 mg, 5.1  $\mu\text{mol}$ ) in  $\text{CH}_3\text{CN}$  (250  $\mu\text{L}$ ) was treated with  $\text{HBF}_4$  (0.1 mM in  $\text{CH}_3\text{CN}$ , 56  $\mu\text{L}$ , 5.6  $\mu\text{mol}$ ) at 0  $^\circ\text{C}$ , and the reaction mixture was stirred at 0  $^\circ\text{C}$  for 2 min before the dropwise addition of *t*-butylnitrite (0.1 mM in  $\text{CH}_3\text{CN}$ , 56  $\mu\text{L}$ , 5.6  $\mu\text{mol}$ ). The resulting mixture was stirred at 0  $^\circ\text{C}$  for 2 min and then treated with an aqueous mixture (250  $\mu\text{L}$ ) containing  $\text{CuCl}$  (13 mg, 128  $\mu\text{mol}$ ) and  $\text{CuCl}_2$  (21 mg, 153  $\mu\text{mol}$ ) that was cooled to 0  $^\circ\text{C}$ . The heterogeneous mixture was allowed to warm to 25  $^\circ\text{C}$  and was stirred for 45 min. The reaction was quenched with the addition of saturated aqueous  $\text{HCO}_3\text{NH}_4$  (4 mL) and extracted with EtOAc (3  $\times$  2 mL). The combined organic layers were washed with saturated aqueous  $\text{NaCl}$  (4 mL), dried ( $\text{Na}_2\text{SO}_4$ ), and the solvent was removed under reduced pressure. PTLC ( $\text{SiO}_2$ , 7%  $\text{CH}_3\text{OH}-\text{CH}_2\text{Cl}_2$ ) afforded **32** (4.0 mg, 57%; typically 57–63%) as a white solid:  $[\alpha]_D^{25} +42$  (*c* 0.1, MeOH);  $^1\text{H}$  NMR ( $\text{CD}_3\text{OD}$ , 600 MHz)  $\delta$  8.32 (br s, 1H), 7.74 (d, *J* = 8.8 Hz, 1H), 7.52 (br s, 1H), 7.51–7.44 (m, 1H), 7.38–7.30 (m, 2H), 7.17 (s, 1H), 7.06 (d, *J* = 6.6 Hz, 1H), 6.99 (d, *J* = 6.7 Hz, 1H), 6.91 (s, 1H), 6.69 (s, 1H), 6.64 (s, 1H), 6.23 (br s, 1H), 5.72 (s, 1H), 5.40 (d, *J* = 4.6 Hz, 1H), 5.33 (s, 1H), 5.23 (s, 1H), 5.19 (s, 1H), 5.07–5.02 (m, 1H), 4.95–4.80 (m, 2H, obscured by  $\text{H}_2\text{O}$ ), 4.77 (s, 2H), 4.37 (m, 1H), 4.18 (s, 3H), 4.16 (s, 1H), 4.09–4.03 (m, 1H), 3.96–3.92 (m, 1H), 3.88 (s, 3H), 3.77–3.71 (m, 2H), 3.69 (s, 3H), 3.65 (s, 3H), 3.59 (t, *J* = 4.4 Hz, 2H), 3.38 (s, 3H), 2.96–2.90 (m, 1H), 2.83 (br s, 3H), 2.66–2.59 (m, 1H), 1.91–1.84 (m, 1H), 1.53 (s, 9H), 0.95 (br d, *J* = 6.4 Hz, 3H), 0.93 (br d, *J* = 6.3 Hz, 3H);  $^{13}\text{C}$  NMR ( $\text{CD}_3\text{OD}$ , 150 MHz)  $\delta$  202.9, 174.7, 171.8, 171.3, 169.5, 169.3, 161.7, 160.1, 158.8,

154.5, 153.4, 152.4, 151.2, 142.6, 140.2, 139.5, 138.3, 138.1, 136.8, 130.4, 130.3, 129.1, 128.7, 127.2, 127.1, 125.7, 125.6, 124.7, 122.7, 117.4, 113.6, 106.7, 106.5, 106.4, 98.9, 96.8, 82.3, 73.3, 72.9, 71.9, 71.5, 70.6, 68.5, 68.2, 64.9, 62.0, 61.4, 61.3, 59.2, 57.1, 56.5, 56.3, 56.04, 55.99, 53.0, 52.4, 49.4, 36.5, 32.1, 30.4, 29.5, 28.9 (3C), 25.7, 23.9, 22.3, 21.7; ESI-TOF HRMS  $m/z$  1393.4264 ( $M^+ + Na$ ,  $C_{66}H_{76}Cl_2N_8O_{18}SNa$  requires 1393.4267).

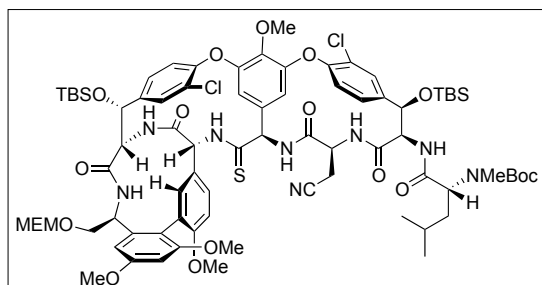

**Compound 33.** The reaction was performed on scales ranging from 4.2–10.0 mg (85–94%, 4.2–9.8 mg); a typical procedure follows: A solution of **32** (4.0 mg, 2.92  $\mu\text{mol}$ ) in anhydrous  $\text{CH}_3\text{CN}$  (200  $\mu\text{L}$ ) was treated with MTBSTFA (69  $\mu\text{L}$ , 2.92 mmol, 100 equiv). The reaction mixture was warmed at 55  $^\circ\text{C}$  under Ar and stirred for 24 h. The reaction mixture was cooled to 25  $^\circ\text{C}$  and the solvent was removed under a stream of  $\text{N}_2$ . The residue was diluted with EtOAc (0.5 mL), 0.1 N HCl (0.5 mL) was added, and the mixture was stirred for 30 min. The layers were separated, and the aqueous layer was extracted with EtOAc (3  $\times$  0.5 mL). The combined organic layers were washed with saturated aqueous NaCl (0.5 mL), dried ( $\text{Na}_2\text{SO}_4$ ) and the solvent was removed under reduced pressure. PTLC ( $\text{SiO}_2$ , 4%  $\text{CH}_3\text{OH}-\text{CH}_2\text{Cl}_2$ ) afforded **33** (4.4 mg, 94%) as a white solid:  $[\alpha]_D^{25} +17$  ( $c$  0.1,  $\text{CHCl}_3$ );  $^1\text{H}$  NMR ( $\text{CD}_3\text{OD}$ , 600 MHz)  $\delta$  7.67 (d,  $J = 8.2$  Hz, 1H), 7.51 (d,  $J = 8.1$  Hz, 1H), 7.42 (br s, 1H), 7.37 (d,  $J = 8.4$  Hz, 1H), 7.28 (br s, 1H), 7.19 (br s, 1H), 7.05 (s, 2 H), 6.92 (br s, 1 H), 6.66 (d,  $J = 2.2$  Hz, 1H), 5.72–5.68 (m, 1H), 5.57 (d,  $J = 4.2$  Hz, 1H), 5.37 (br s, 1H), 5.31 (br s, 1H), 5.27–5.15 (m, 2H), 5.10 (br s, 1H), 4.93–4.84 (m, 2H, obscured by  $\text{H}_2\text{O}$ ), 4.78–4.70 (m, 2H), 4.60 (br s, 1H), 4.43–4.38 (m, 1H), 4.21 (s, 3H), 4.16 (d,  $J = 2.1$  Hz, 1H), 3.98–3.93 (m, 1H), 3.93–3.90 (m, 1H), 3.89 (s, 3H), 3.75–3.72 (m, 2H), 3.71 (s, 3H), 3.66 (s, 3H), 3.58 (t,  $J = 4.6$  Hz, 2H), 3.38 (s, 3H), 3.05–2.98 (m, 1H), 2.89 (s, 3H), 2.83 (s, 2H), 2.68–2.58 (m, 1H), 1.97–1.89 (m, 1H), 1.51 (s, 9H), 1.50–1.43 (m, 2H), 1.04 (s, 9H), 0.97 (d,  $J = 6.4$  Hz, 1H), 0.93 (s, 9H), 0.92–0.89 (m, 3H), 0.15 (s, 3H), 0.14 (s, 3H), 0.14 (s, 3H), 0.13 (s, 3H);  $^{13}\text{C}$  NMR (acetone- $d_6$ , 150 MHz)  $\delta$  202.7, 171.8, 170.6, 169.5, 168.4, 168.3, 167.6, 161.1, 159.7, 158.4, 157.3, 154.4, 152.8, 151.6, 151.0, 141.6, 140.0, 139.4, 138.3, 137.6, 136.1, 130.5, 129.9, 129.6, 129.3, 127.9, 127.8, 127.3, 126.7, 125.5, 125.2, 124.6, 122.6, 116.9, 113.4, 106.5, 106.2, 99.0, 96.4, 80.9, 77.2, 74.6, 73.8, 72.5, 68.0, 67.8, 64.3, 61.6, 60.9, 60.8, 60.3, 60.1, 58.8, 56.6, 56.5, 56.1, 55.8, 52.7, 51.8, 37.0, 30.6, 23.6, 22.6, 19.2, 19.0, 14.3, 1.4, -4.2, -4.6, -4.8, -4.9; ESI-TOF HRMS  $m/z$  1621.5940 ( $M^+ + Na$ ,  $\text{C}_{78}\text{H}_{104}\text{Cl}_2\text{N}_8\text{O}_{18}\text{SSi}_2\text{Na}$  requires 1621.5997).

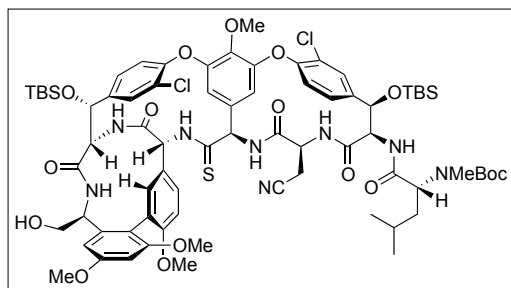

**Compound 34.** The reaction was performed on scales ranging from 2.4–5.4 mg (50–76%, 1.5–2.9 mg); a typical procedure follows: A solution of **33** (2.4 mg, 1.5  $\mu\text{mol}$ ) in anhydrous  $\text{CH}_2\text{Cl}_2$  (200  $\mu\text{L}$ ) at 0  $^\circ\text{C}$  was treated with *B*-bromocatecholborane (1.2 mg, 6.0  $\mu\text{mol}$ , 4 equiv) in 50  $\mu\text{L}$   $\text{CH}_2\text{Cl}_2$  and stirred at 0  $^\circ\text{C}$  under Ar for 2 h. After the reaction was complete, the mixture was treated with *i*-Pr<sub>2</sub>NEt (2.6  $\mu\text{L}$ , 15  $\mu\text{mol}$ , 10 equiv) followed by Boc<sub>2</sub>O (1.7  $\mu\text{L}$ , 7.5  $\mu\text{mol}$ , 5 equiv). The reaction mixture was stirred at 25  $^\circ\text{C}$  for 12 h, concentrated, and the residue purified by PTLC ( $\text{SiO}_2$ , 6%  $\text{CH}_3\text{OH}-\text{CH}_2\text{Cl}_2$ ) followed by passage through a short silica gel plug (2%  $\text{CH}_3\text{OH}-\text{CH}_2\text{Cl}_2$ ) to afford **34** (1.5 mg, 66%) as a white solid:  $[\alpha]_D^{25} +11$  (c 0.1,  $\text{CHCl}_3$ );  $^1\text{H}$  NMR (acetone-*d*<sub>6</sub>, 600 MHz)  $\delta$  7.65–7.47 (m, 3H), 7.39 (br s, 1H), 7.31 (d,  $J = 8.2$  Hz, 1H), 7.26 (br s, 1H), 7.14 (br d,  $J = 8.2$  Hz, 1H), 7.04 (br d,  $J = 8.4$  Hz, 1H), 6.96 (s, 1H), 6.89 (br s, 1H), 6.75 (br s, 1H), 6.66 (d,  $J = 2.2$  Hz, 1H), 6.52 (br s, 1H), 6.15–5.95 (br m, 1H), 5.56 (d,  $J = 4.2$  Hz, 1H), 5.53 (s, 1H), 5.34 (br s, 1H), 5.32–5.10 (m, 2H), 4.65 (br s, 1H), 4.54–4.46 (m, 1H), 4.32–4.26 (m, 1H), 4.17 (s, 3H), 4.04–3.94 (m, 3H), 3.88 (s, 3H), 3.81 (s, 1H), 3.67 (s, 3H), 3.60 (s, 3H), 2.95–2.87 (m, 1H), 2.86 (br s, 3H), 2.60 (s, 1H), 2.15 (s, 2H), 1.71–1.64 (m, 1H), 1.53 (s, 9H), 1.50–1.43 (br m, 2H), 1.20 (s, 3H), 1.03 (s, 9H), 0.98–0.95 (m, 3H), 0.92 (s, 9H), 0.91–0.84 (m, 3H), 0.18 (s, 3H), 0.17 (s, 3H), 0.15 (s, 3H), 0.12 (s, 3H);  $^{13}\text{C}$  NMR (acetone-*d*<sub>6</sub>, 150 MHz)  $\delta$  202.9, 171.9, 170.8, 169.7, 168.7, 168.5, 161.3, 159.8, 158.5, 157.4, 154.5, 152.9, 151.8, 151.2, 141.7, 140.1, 139.6, 138.4, 137.7, 136.2, 130.6, 130.0, 129.7, 129.4, 128.1, 127.9, 127.4, 126.9, 125.6, 125.3, 124.7, 122.7, 117.0, 113.5, 106.4, 106.3, 99.1, 81.0, 77.3, 74.7, 73.9, 69.8, 64.3, 63.6, 63.4, 61.7, 61.5, 60.9, 60.4, 60.3, 56.7, 56.6, 56.2, 56.0, 55.8, 55.6, 55.5, 55.4, 51.9, 37.1, 32.1, 28.8, 26.5, 26.4, 25.9, 23.8, 22.7, 19.2, 19.2, –4.2, –4.5, –4.6, –4.9; ESI-TOF HRMS  $m/z$  1533.5412 ( $\text{M}^+ + \text{Na}$ ,  $\text{C}_{78}\text{H}_{104}\text{Cl}_2\text{N}_8\text{O}_{18}\text{SSi}_2\text{Na}$  requires 1533.5472).

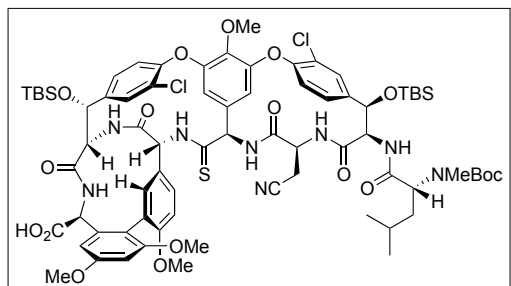

**Compound 35.** The reaction was performed on scales ranging from 0.5–3.2 mg (typical yield ~50%). A representative procedure follows: A solution of  $\text{CrO}_3$  (17.9 mg) in water (340  $\mu\text{L}$ ) was treated with 30  $\mu\text{L}$  of conc.  $\text{H}_2\text{SO}_4$ . An aliquot of this stock solution (7.6  $\mu\text{L}$ , 4 equiv of  $\text{CrO}_3$ ) was added into a solution of **34** (1.40 mg, 0.93  $\mu\text{mol}$ ) in acetone (100  $\mu\text{L}$ ). The reaction



mixture was stirred at 25 °C for 7 h, cooled to 0 °C, and quenched with the addition of isopropanol (200  $\mu$ L). The mixture was passed through a plug of Celite (acetone wash). The solvent was removed under a stream of N<sub>2</sub>. Purification by PTLC (SiO<sub>2</sub>, 12% CH<sub>3</sub>OH–CH<sub>2</sub>Cl<sub>2</sub>) gave **35** (0.96 mg, 69%) as a white solid that was typically carried forward without further characterization: ESI-TOF HRMS  $m/z$  1525.5470 (M<sup>+</sup> + H, C<sub>74</sub>H<sub>94</sub>Cl<sub>2</sub>N<sub>8</sub>O<sub>17</sub>SSi<sub>2</sub> requires 1525.5446).

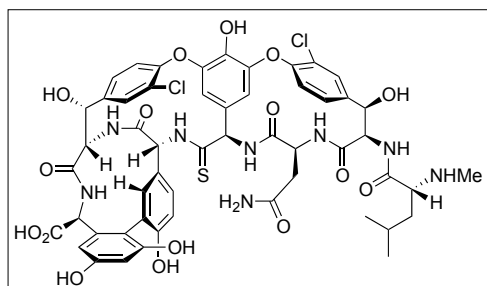

**Compound 8.** A solution of **35** (0.96 mg, 0.63  $\mu$ mol) in neat TFA (100  $\mu$ L) was stirred at 25 °C for 12 h. The solvent was removed under a stream of N<sub>2</sub> and the residue containing **36** (95%) was treated with AlBr<sub>3</sub> (44 mg, 167  $\mu$ mol, 249 equiv) and EtSH (50  $\mu$ L). The resulting mixture was stirred at room temperature for 60 h before it was cooled to 0 °C, and quenched by the addition of CH<sub>3</sub>OH (0.2 mL). The solvent was removed under a stream of N<sub>2</sub>. The residue was suspended in water (0.5 mL) and purified by short reverse phase silica gel chromatography (C18-SiO<sub>2</sub>, 50% CH<sub>3</sub>CN–H<sub>2</sub>O) and subsequent semi-preparative reverse-phase HPLC (5–20% MeCN/H<sub>2</sub>O–0.07% TFA gradient over 10 min then 20% MeCN/H<sub>2</sub>O–0.07% TFA isocratic) to afford **8** (0.46 mg, 63%, 2 steps) as a white film: <sup>1</sup>H NMR (CD<sub>3</sub>OD, 600 MHz)  $\delta$  7.65 (br s, 3H), 7.59 (d,  $J$  = 12 Hz, 1H), 7.37 (br s, 1H), 7.28 (d,  $J$  = 6.0 Hz, 1H), 7.21 (br s, 1H), 6.75 (d,  $J$  = 6 Hz, 1H), 6.44 (s, 1H), 6.39 (s, 1H), 6.12 (br s, 1H), 5.82 (br s, 1H), 5.41–5.24 (m, 4H), 4.85–4.70 (m, 3H, obscured by D<sub>2</sub>O), 4.42 (d,  $J$  = 12 Hz, 1H), 4.27 (s, 1H), 4.05–3.97 (m, 1H), 3.03 (d,  $J$  = 6 Hz, 1H), 2.77 (s, 3H), 2.22–2.17 (m, 1H), 1.91–1.93 (m, 1H), 1.74–1.64 (m, 1H), 1.64–1.56 (m, 1H), 0.99–0.89 (m, 6H); ESI-TOF HRMS  $m/z$  1159.2710 (M<sup>+</sup> + H, C<sub>53</sub>H<sub>53</sub>Cl<sub>2</sub>N<sub>8</sub>O<sub>16</sub>S requires 1159.2672).

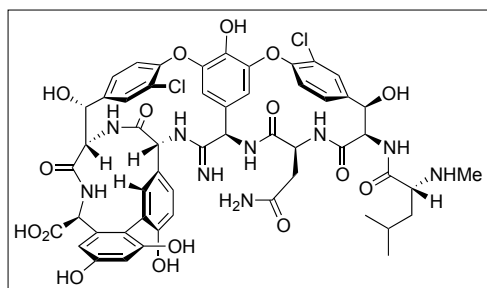

**Compound 7.** The reaction was performed on scales ranging from 0.3–1.2 mg. A representative procedure follows: A solution of **8** (0.46 mg, 0.40  $\mu$ mol) in anhydrous saturated NH<sub>3</sub>–CH<sub>3</sub>OH (0.5 mL) was treated with silver acetate (0.70 mg, 4.2  $\mu$ mol, 10 equiv). The reaction mixture was stirred at 25 °C for 12 h before the solvent was removed under a stream of N<sub>2</sub>. The residue was dissolved in 50% MeOH in H<sub>2</sub>O (0.4 mL) and purified by reverse-phase

HPLC (5–20% MeCN/H<sub>2</sub>O–0.07% TFA gradient over 10 min then 20% MeCN/H<sub>2</sub>O–0.07% TFA isocratic) to afford **7** (50%) as a white film: <sup>1</sup>H NMR (CD<sub>3</sub>OD, 600 MHz) δ 7.73–7.64 (m, 2H), 7.61–7.52 (br m, 1H), 7.41 (br s, 1H), 7.12 (d, *J* = 6 Hz, 1H), 7.08–7.02 (m, 2H), 6.87 (d, *J* = 12 Hz, 1H), 6.49–6.42 (m, 2H), 6.16–6.04 (br m, 1H), 5.53 (br s, 1H), 5.47–5.29 (m, 4H), 4.75–4.50 (m, 3H, obscured by D<sub>2</sub>O), 4.31–4.24 (m, 1H), 4.22–4.12 (m, 1H), 4.11–4.05 (m, 1H), 2.85 (s, 3H), 2.85–2.81 (m, 1H), 2.45–2.37 (m, 1H), 1.85–1.75 (m, 1H), 1.64–1.54 (m, 2H), 0.94–0.79 (m, 6H); MALDI-TOF *m/z* 1142.3 (M<sup>+</sup> + H, C<sub>53</sub>H<sub>54</sub>Cl<sub>2</sub>N<sub>9</sub>O<sub>16</sub> requires 1142.3); ESI-TOF HRMS *m/z* 1142.3077 (M<sup>+</sup> + H, C<sub>53</sub>H<sub>54</sub>Cl<sub>2</sub>N<sub>9</sub>O<sub>16</sub> requires 1142.3066).

Prior to biological evaluation, the compound was purified by semi-preparative reverse-phase HPLC (5–20% MeCN/H<sub>2</sub>O–0.07% TFA gradient over 10 min then 20% MeCN/H<sub>2</sub>O–0.07% TFA isocratic).

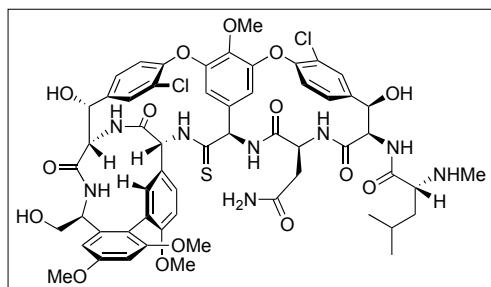

**Compound 42.** A solution of **32** (2.05 mg, 1.49 μmol) in neat TFA (0.5 mL) was stirred at 25 °C for 12 h. The solvent was removed under a stream of N<sub>2</sub>, the crude residue was dissolved in MeOH and the solution was stirred for 18 h before the solvent was removed under a stream of N<sub>2</sub>. The residue was dissolved in 1:1 MeOH:H<sub>2</sub>O (0.5 mL) and purified by semi-preparative reverse-phase HPLC (10–50% MeCN/H<sub>2</sub>O–0.07% TFA) to afford **42** (1.24 mg, 69%) as a white film: <sup>1</sup>H NMR (CD<sub>3</sub>OD, 600 MHz) δ 7.67–7.63 (m, 2H), 7.58 (dd, *J* = 12.2, 2.2 Hz, 1H), 7.51 (br s, 1H), 7.38 (d, *J* = 12.1 Hz, 1H), 7.33 (d, *J* = 12.2 Hz, 1H), 7.30 (dd, *J* = 14.5, 4.4 Hz, 1H), 7.03 (d, *J* = 12.2 Hz, 1H), 6.85 (d, *J* = 2.1 Hz, 1H), 6.58 (d, *J* = 2.2 Hz, 1H), 6.53 (d, *J* = 2.3 Hz, 1H), 6.26 (d, *J* = 2.2 Hz, 1H), 6.04 (d, *J* = 2.2 Hz, 1H), 5.49 (d, *J* = 4.6 Hz, 1H), 5.32 (d, *J* = 4.5 Hz, 1H), 5.21 (t, *J* = 4.6 Hz, 1H), 5.16 (s, 1H), 4.22–4.14 (m, 1H), 4.17 (s, 3H), 4.01–3.94 (m, 2H), 3.93–3.87 (m, 1H), 3.86 (s, 3H), 3.75 (s, 1H), 3.74–3.71 (m, 2H), 3.69 (s, 3H), 3.64 (s, 3H), 2.83 (s, 3H), 2.78 (dd, *J* = 12.4, 4.6 Hz, 1H), 2.56 (dd, *J* = 12.1, 4.5 Hz, 1H), 1.90–1.84 (m, 2H), 1.74–1.64 (m, 2H), 0.93 (d, *J* = 6.2 Hz, 3H), 0.90 (d, *J* = 6.2 Hz, 3H); ESI-TOF HRMS *m/z* 1201.2483 (M<sup>+</sup> + H, C<sub>57</sub>H<sub>62</sub>Cl<sub>2</sub>N<sub>8</sub>O<sub>15</sub>S requires 1201.3505).

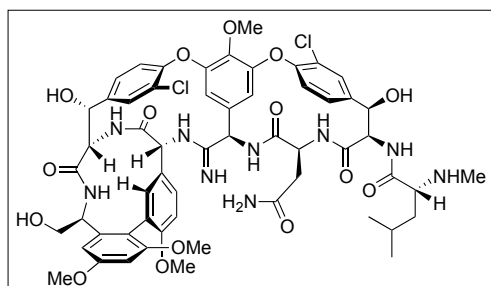

**Compound 43.** A solution of **42** (1.24 mg, 1.03 μmol) in anhydrous saturated NH<sub>3</sub>-CH<sub>3</sub>OH (0.5 mL) was treated with silver acetate (1.72 mg, 10.3 μmol, 10 equiv). The

reaction mixture was stirred at room temperature for 24 h before the solvent was removed under a stream of N<sub>2</sub>. The residue was dissolved in 40% MeOH–H<sub>2</sub>O (0.4 mL + 10 μL TFA) and purified by semi-preparative reverse-phase HPLC (10–50% MeCN/H<sub>2</sub>O–0.07% TFA) to afford **43** (0.77 mg, 63%) as a white film. The sample of **43**, even after repeated purification, rapidly (< 1h) equilibrates to three interconverting and easily separable (HPLC) components (1:1:2), all of which display the same mwt (MS): ESI-TOF HRMS *m/z* 1184.3874 (M<sup>+</sup> + H, C<sub>57</sub>H<sub>63</sub>Cl<sub>2</sub>N<sub>9</sub>O<sub>15</sub> requires 1184.3893).

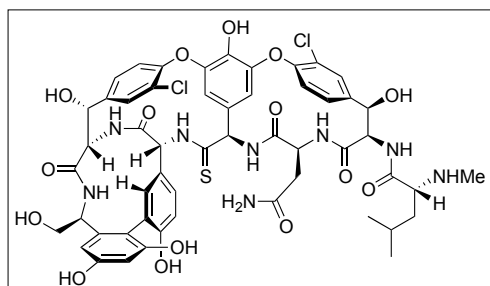

**Compound 44.** A solution of **32** (2.20 mg, 1.60 μmol) in neat TFA (0.6 mL) was stirred at 25 °C for 12 h. The solvent was removed under a stream of N<sub>2</sub> and the residue of **42** was treated with AlBr<sub>3</sub> (107 mg, 400 μmol) and EtSH (100 μL). The resulting mixture was stirred at 25 °C for 60 h before it was diluted with CH<sub>2</sub>Cl<sub>2</sub> (0.5 mL), cooled to 0 °C, and quenched by the addition of CH<sub>3</sub>OH (0.2 mL). The solvent was removed under a stream of N<sub>2</sub>. The residue was suspended in water (0.5 mL), and purified by short reverse-phase silica gel chromatography (C18–SiO<sub>2</sub>, 50% CH<sub>3</sub>CN–H<sub>2</sub>O) and semi-preparative reverse-phase HPLC (5–20% MeCN/H<sub>2</sub>O–0.07% TFA gradient over 10 min then 20% MeCN/H<sub>2</sub>O–0.07% TFA isocratic) to afford **44** (1.26 mg, 69%, 2 steps) as a white film: <sup>1</sup>H NMR (CD<sub>3</sub>OD, 500 MHz) δ 8.34 (br d, *J* = 12.2 Hz, 1H), 8.23 (br s, 1H), 7.70–7.57 (m, 4H), 7.37–7.32 (m, 1H), 7.29 (d, *J* = 12.2 Hz, 1H), 7.19 (d, *J* = 2.2 Hz, 1H), 6.80 (m, 1H), 6.75 (d, *J* = 12.1 Hz, 1H), 6.65 (d, *J* = 2.1 Hz, 1H), 6.42 (d, *J* = 2.2 Hz, 1H), 6.15 (br d, *J* = 2.2 Hz, 1H), 5.82 (br s, 1H), 5.39–5.24 (m, 4H), 4.46 (d, *J* = 12.2 Hz, 1H), 4.28 (d, *J* = 4.6 Hz, 1H), 4.23 (s, 1H), 4.08–3.96 (m, 3H), 3.02 (br d, *J* = 12.2 Hz, 1H), 2.78 (s, 3H), 2.32–2.22 (m, 1H), 1.92–1.83 (m, 1H), 1.78–1.65 (m, 2H), 1.00 (d, *J* = 6.2 Hz, 3H), 0.98 (d, *J* = 6.2 Hz, 3H); ESI-TOF HRMS *m/z* 1145.1974 (M<sup>+</sup> + H, C<sub>53</sub>H<sub>55</sub>Cl<sub>2</sub>N<sub>8</sub>O<sub>15</sub>S requires 1145.2806).

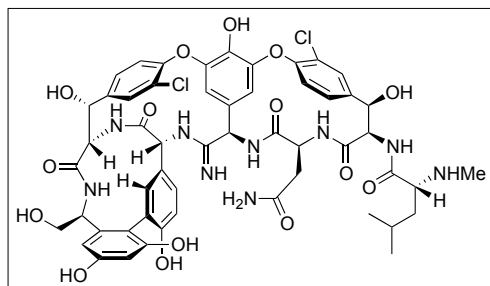

**Compound 45.** A solution of **44** (1.12 mg, 0.977 μmol) in anhydrous saturated NH<sub>3</sub>–CH<sub>3</sub>OH (0.3 mL) was treated with silver acetate (1.63 mg, 9.77 μmol). The reaction mixture was stirred at 25 °C for 12 h before the solvent was removed under a stream of N<sub>2</sub>. The residue was dissolved in 40% MeOH–H<sub>2</sub>O (0.4 mL + 10 μL TFA) and purified by short reverse-phase silica gel chromatography (C18–SiO<sub>2</sub>, 50% CH<sub>3</sub>CN–H<sub>2</sub>O) to provide **45** (0.94 mg, 85%) as

an off-white solid that was further purified by semi-preparative reverse-phase HPLC (5–20% MeCN/H<sub>2</sub>O–0.07% TFA gradient over 10 min then 20% MeCN/H<sub>2</sub>O–0.07% TFA isocratic) prior to biological testing to afford **45** as a white film: <sup>1</sup>H NMR (CD<sub>3</sub>OD, 600 MHz) δ 7.56 (s, 1H), 7.52–7.46 (m, 2H), 7.34 (s, 1H), 7.21 (d, *J* = 12.1 Hz, 2H), 6.96–6.90 (m, 2H), 6.73 (d, *J* = 12.2 Hz, 1H), 6.58 (s, 1H), 6.31 (s, 1H), 5.68 (s, 1H), 5.34 (d, *J* = 4.4 Hz, 1H), 5.19 (s, 2H), 5.10–4.70 (m, 2H, obstructed by H<sub>2</sub>O), 4.52 (br s, 1H), 4.26 (br s, 1H), 4.13–4.04 (m, 1H), 4.01–3.87 (m, 3H), 2.75 (d, *J* = 12.2 Hz, 1H), 2.35 (dd, *J* = 16.2, 4.4 Hz, 1H), 2.26 (s, 3H), 1.81–1.71 (m, 1H), 1.60–1.41 (m, 2H), 1.31–1.08 (m, 2H), 0.91–0.80 (m, 6H); ESI-TOF HRMS *m/z* 1128.2276 (M<sup>+</sup> + H, C<sub>53</sub>H<sub>56</sub>Cl<sub>2</sub>N<sub>9</sub>O<sub>15</sub> requires 1128.3195).

**Titration Binding Assays with Model D-Ala-D-Ala and D-Ala-D-Lac Ligands 2 and 4.** The binding constants for all compounds for association with the model ligands *N,N'*-Ac<sub>2</sub>-Lys-D-Ala-D-Ala (**2**), *N,N'*-Ac<sub>2</sub>-Lys-D-Ala-D-Lac (**4**), ketone **3**<sup>12</sup>, and **48–50** were determined according to literature protocol.<sup>44</sup> UV difference experiments were carried out on a CARY 3E UV-Vis spectrometer. UV scans were run with a baseline correction that consisted of 0.02 M sodium citrate buffer (pH = 5.1) and covered a range from 200 to 345 nm. A solution of the vancomycin aglycon derivative (7.7 × 10<sup>-5</sup> M in 0.02 M sodium citrate buffer) was placed into a quartz UV cuvette (0.1 cm path length) and the UV spectrum recorded versus a reference cell containing 0.02 M sodium citrate buffer. UV spectra were recorded after each addition of a solution of *N,N'*-Ac<sub>2</sub>-Lys-D-Ala-D-Ala (**2**), *N,N'*-Ac<sub>2</sub>-Lys-D-Ala-D-Lac (**4**), or the related ligands **3** and **48–50** in 0.02 M sodium citrate buffer to each cell from 0.1 to 60.0 equivalents. The absorbance value at the λ<sub>max</sub> was recorded and the running change in absorbance, ΔA<sub>x equiv</sub> (A<sub>initial</sub> – A<sub>x equiv</sub>), measured. The number of ligand equivalents was plotted versus ΔA to afford the ligand binding titration curve. The break point of this curve is the saturation point of the system and its xy coordinates were determined by establishing the intersection of the linear fits of the pre and postsaturation curves. ΔA<sub>saturation</sub> was calculated and employed to determine the concentration of free ligand in solution at each titration point. ΔA was plotted versus ΔA/free ligand concentration to give a Scatchard plot from which the binding constants were determined.

**Antimicrobial Assays.** *E. Faecilis* (BM4166) was propagated and MICs were determined in duplicate by the broth microdilution method according to standard microbiological practice.<sup>S2</sup>

S2. Clinical and Laboratory Standards Institute. *Methods for Dilution Antimicrobial Susceptibility Tests for Bacteria That Grow Aerobically*; Approved Standard, 7th ed.; CLSI document M07-A8; Clinical and Laboratory Standards Institute: Wayne, PA, 2009.

Full citation for reference 5c: Klevens, R. M.; Morrison, M. A.; Nadle, J.; Petit, S.; Gershman, K.; Ray, S.; Harrison, L. H.; Lynfield, R.; Dumyati, G.; Townes, J. M.; Craig, A. S.; Zell, E. R.; Fosheim, G. E.; McDougal, L. K.; Carey, R. B.; Fridkin, S. K. *J. Am. Med. Assoc.* **2007**, *298*, 1763.

Full citation for reference 26a: Kamenecka, T. M.; Park, Y.-J.; Lin, L. S.; de Laszlo, S.; McCauly, E. D.; Riper, G. V.; Egger, L.; Kidambi, U.; Mumford, R. A.; Tong, S.; Tang, W.; Colletti, A.; Teffera, Y.; Stearns, R.; MacCoss, M.; Schmidt, J. A.; Hagmann, W. K. *Bioorg. Med. Chem. Lett.* **2004**, *14*, 2323.

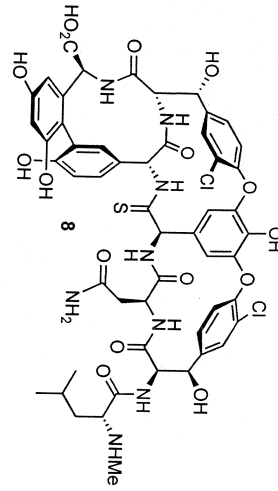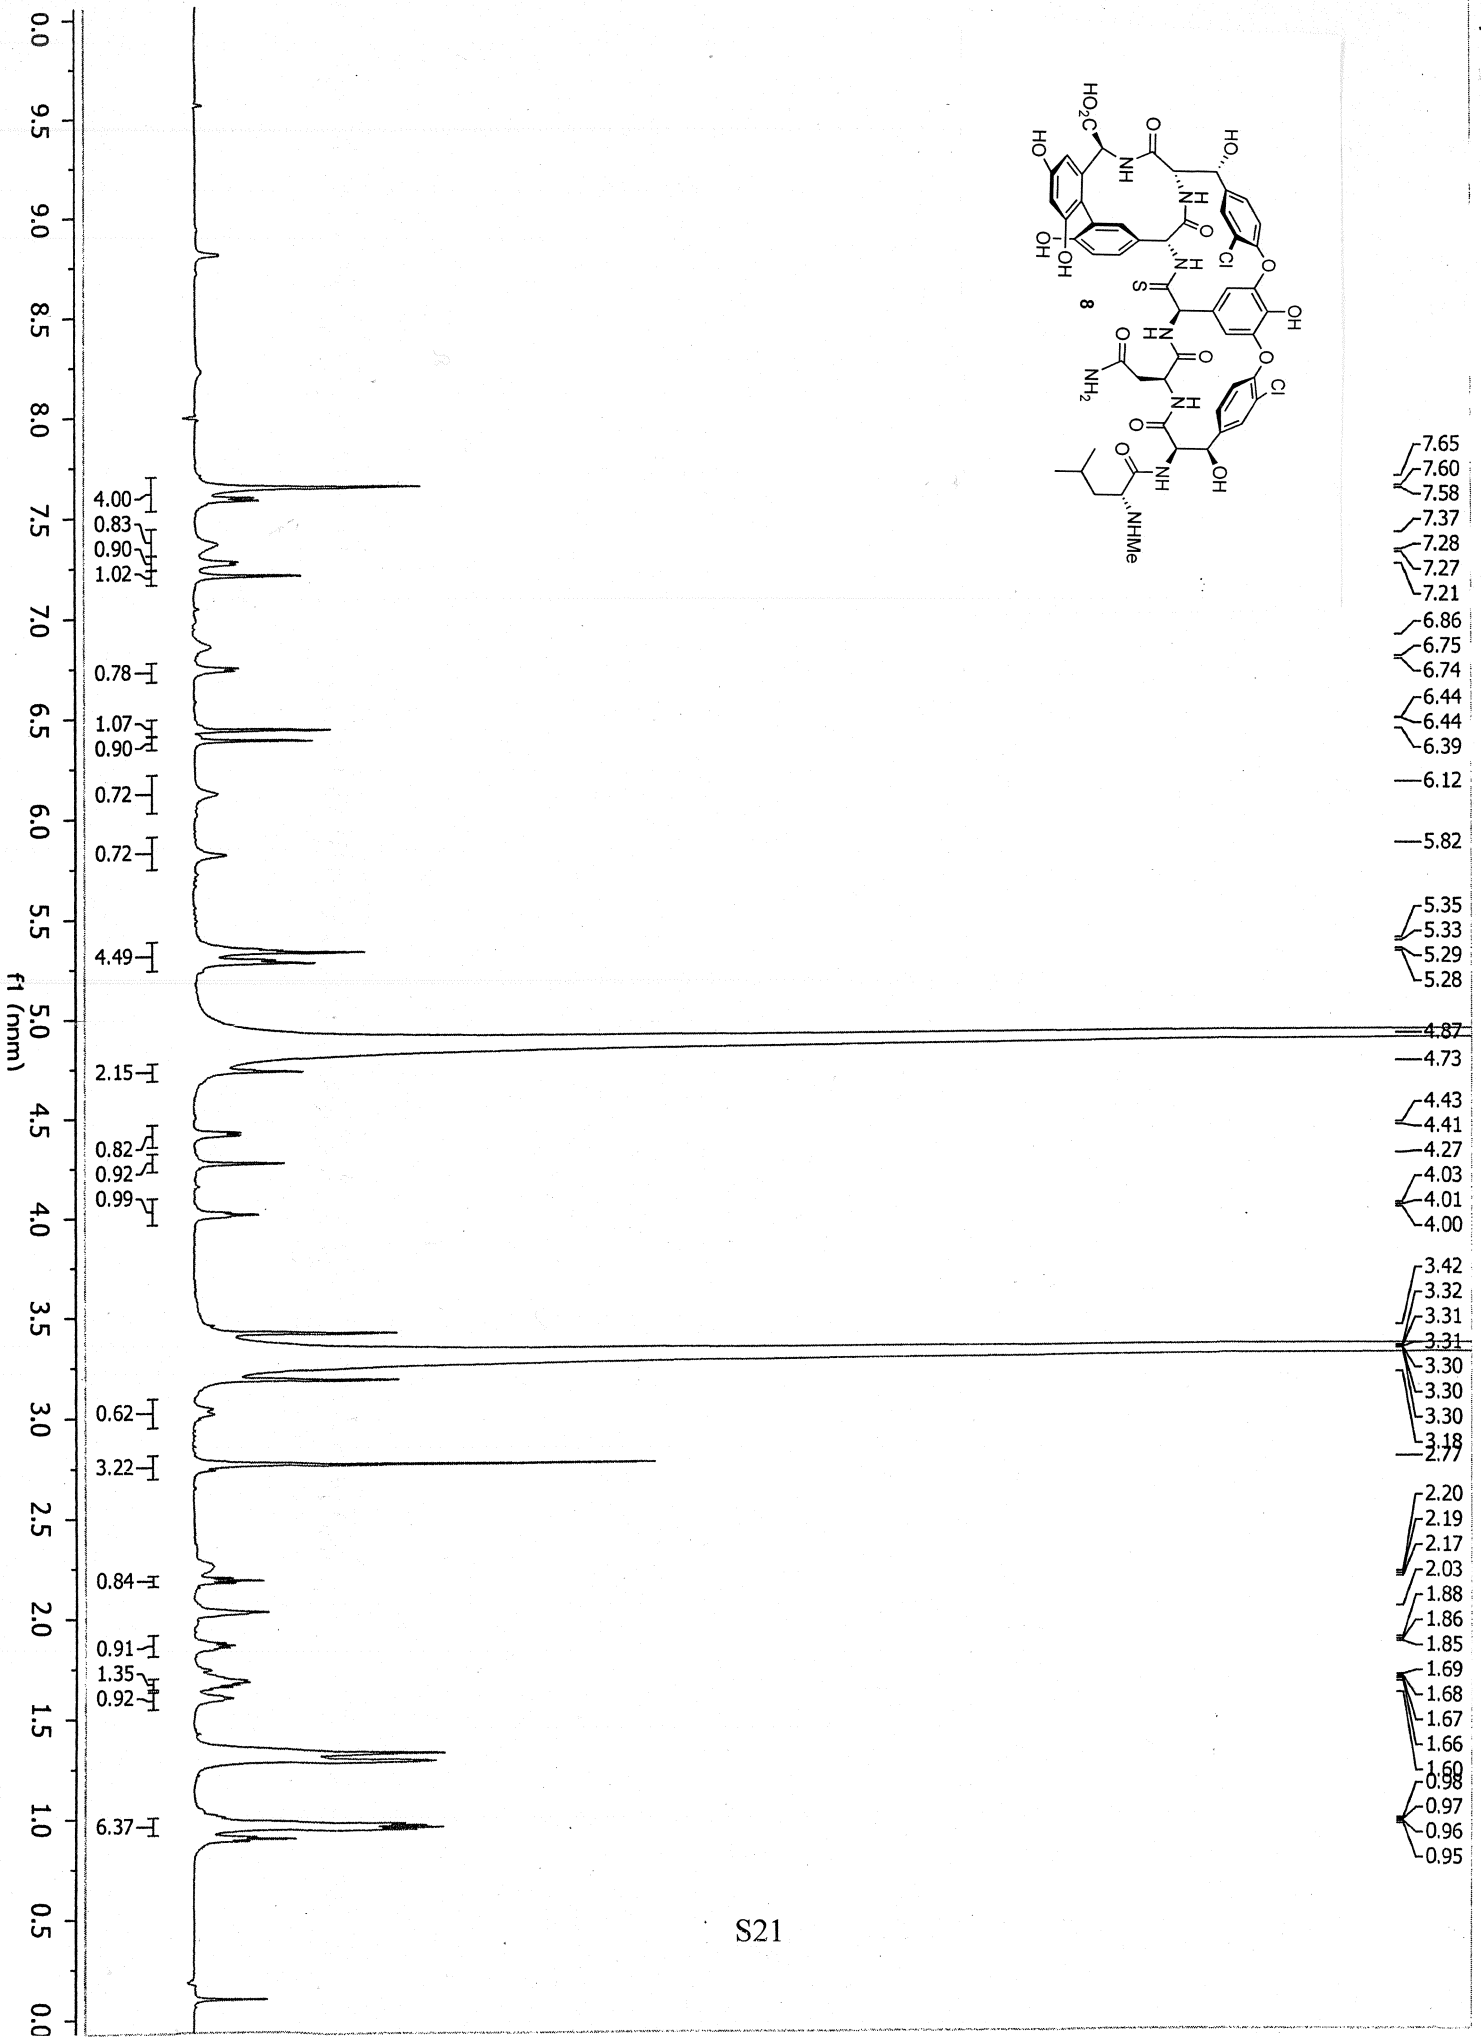

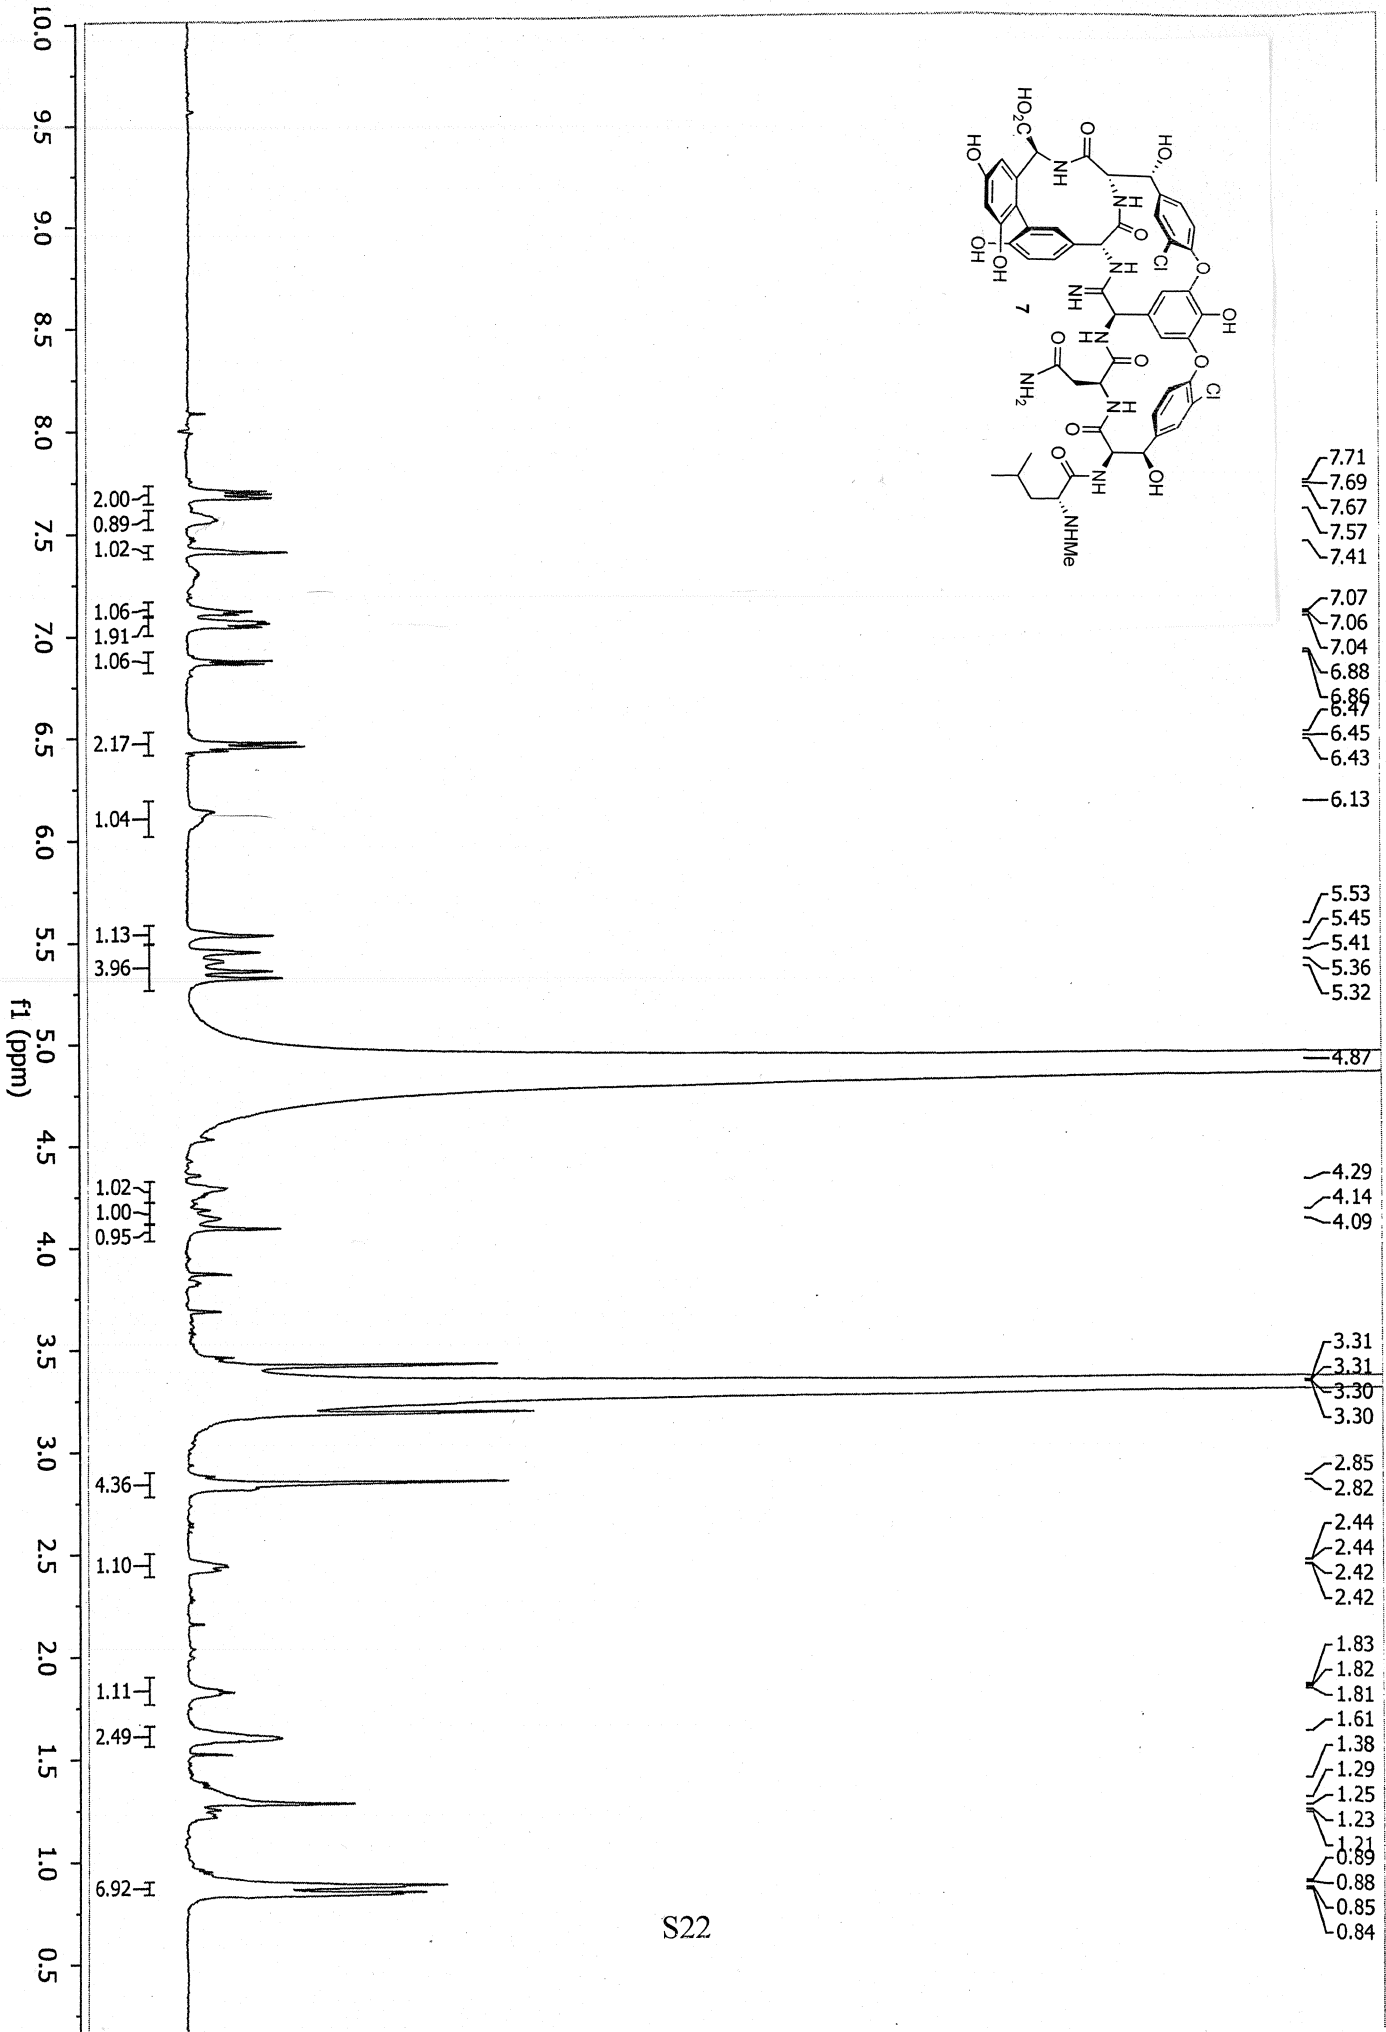

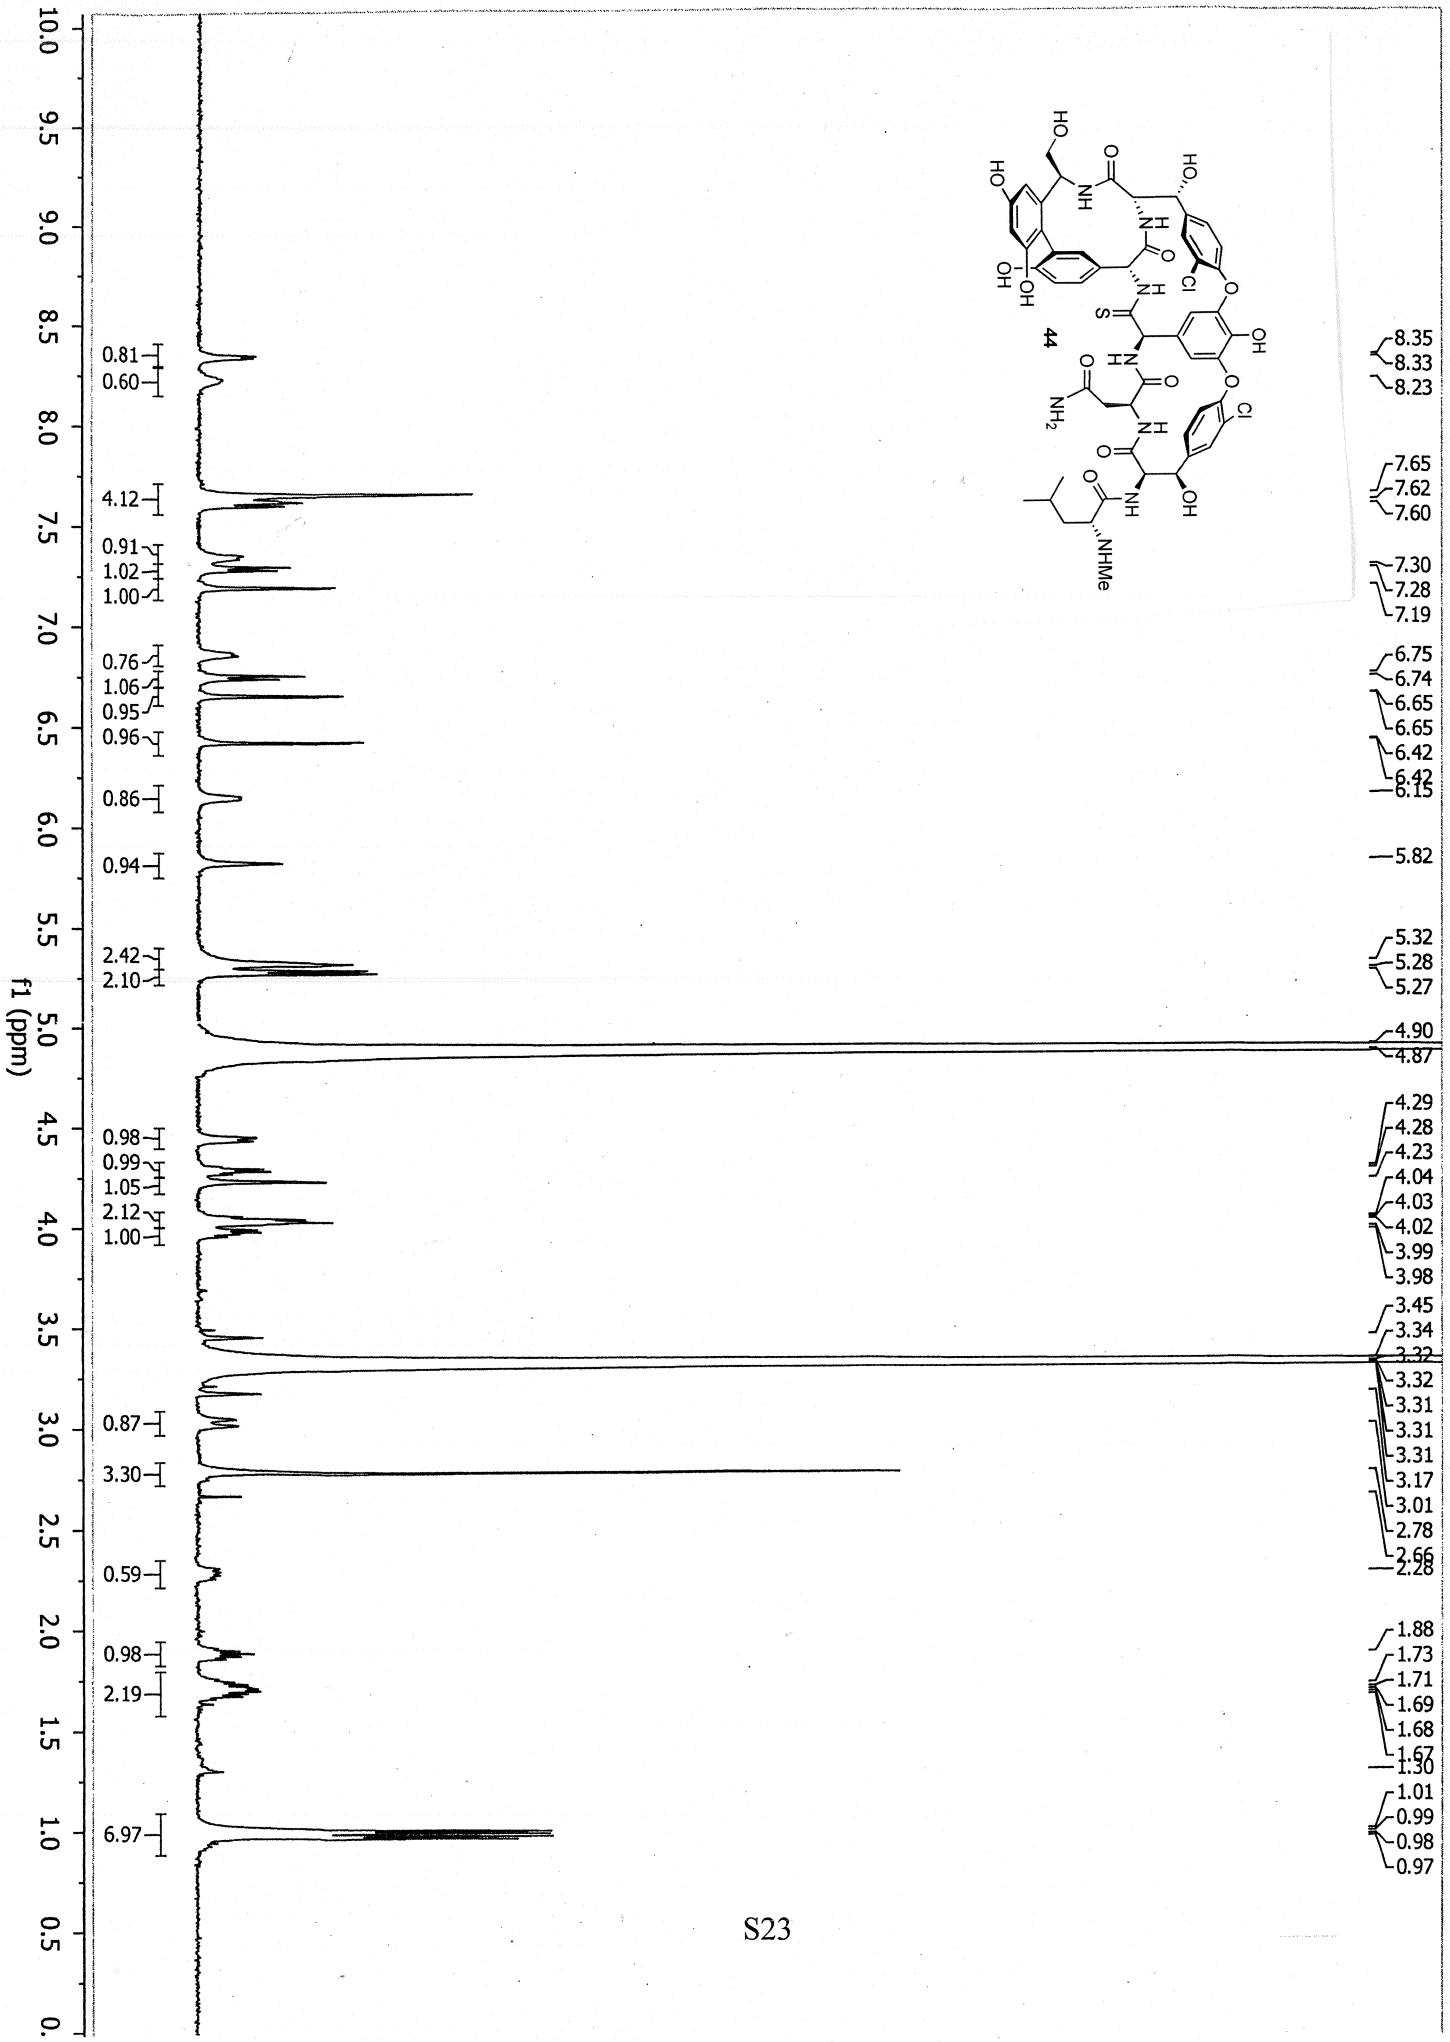

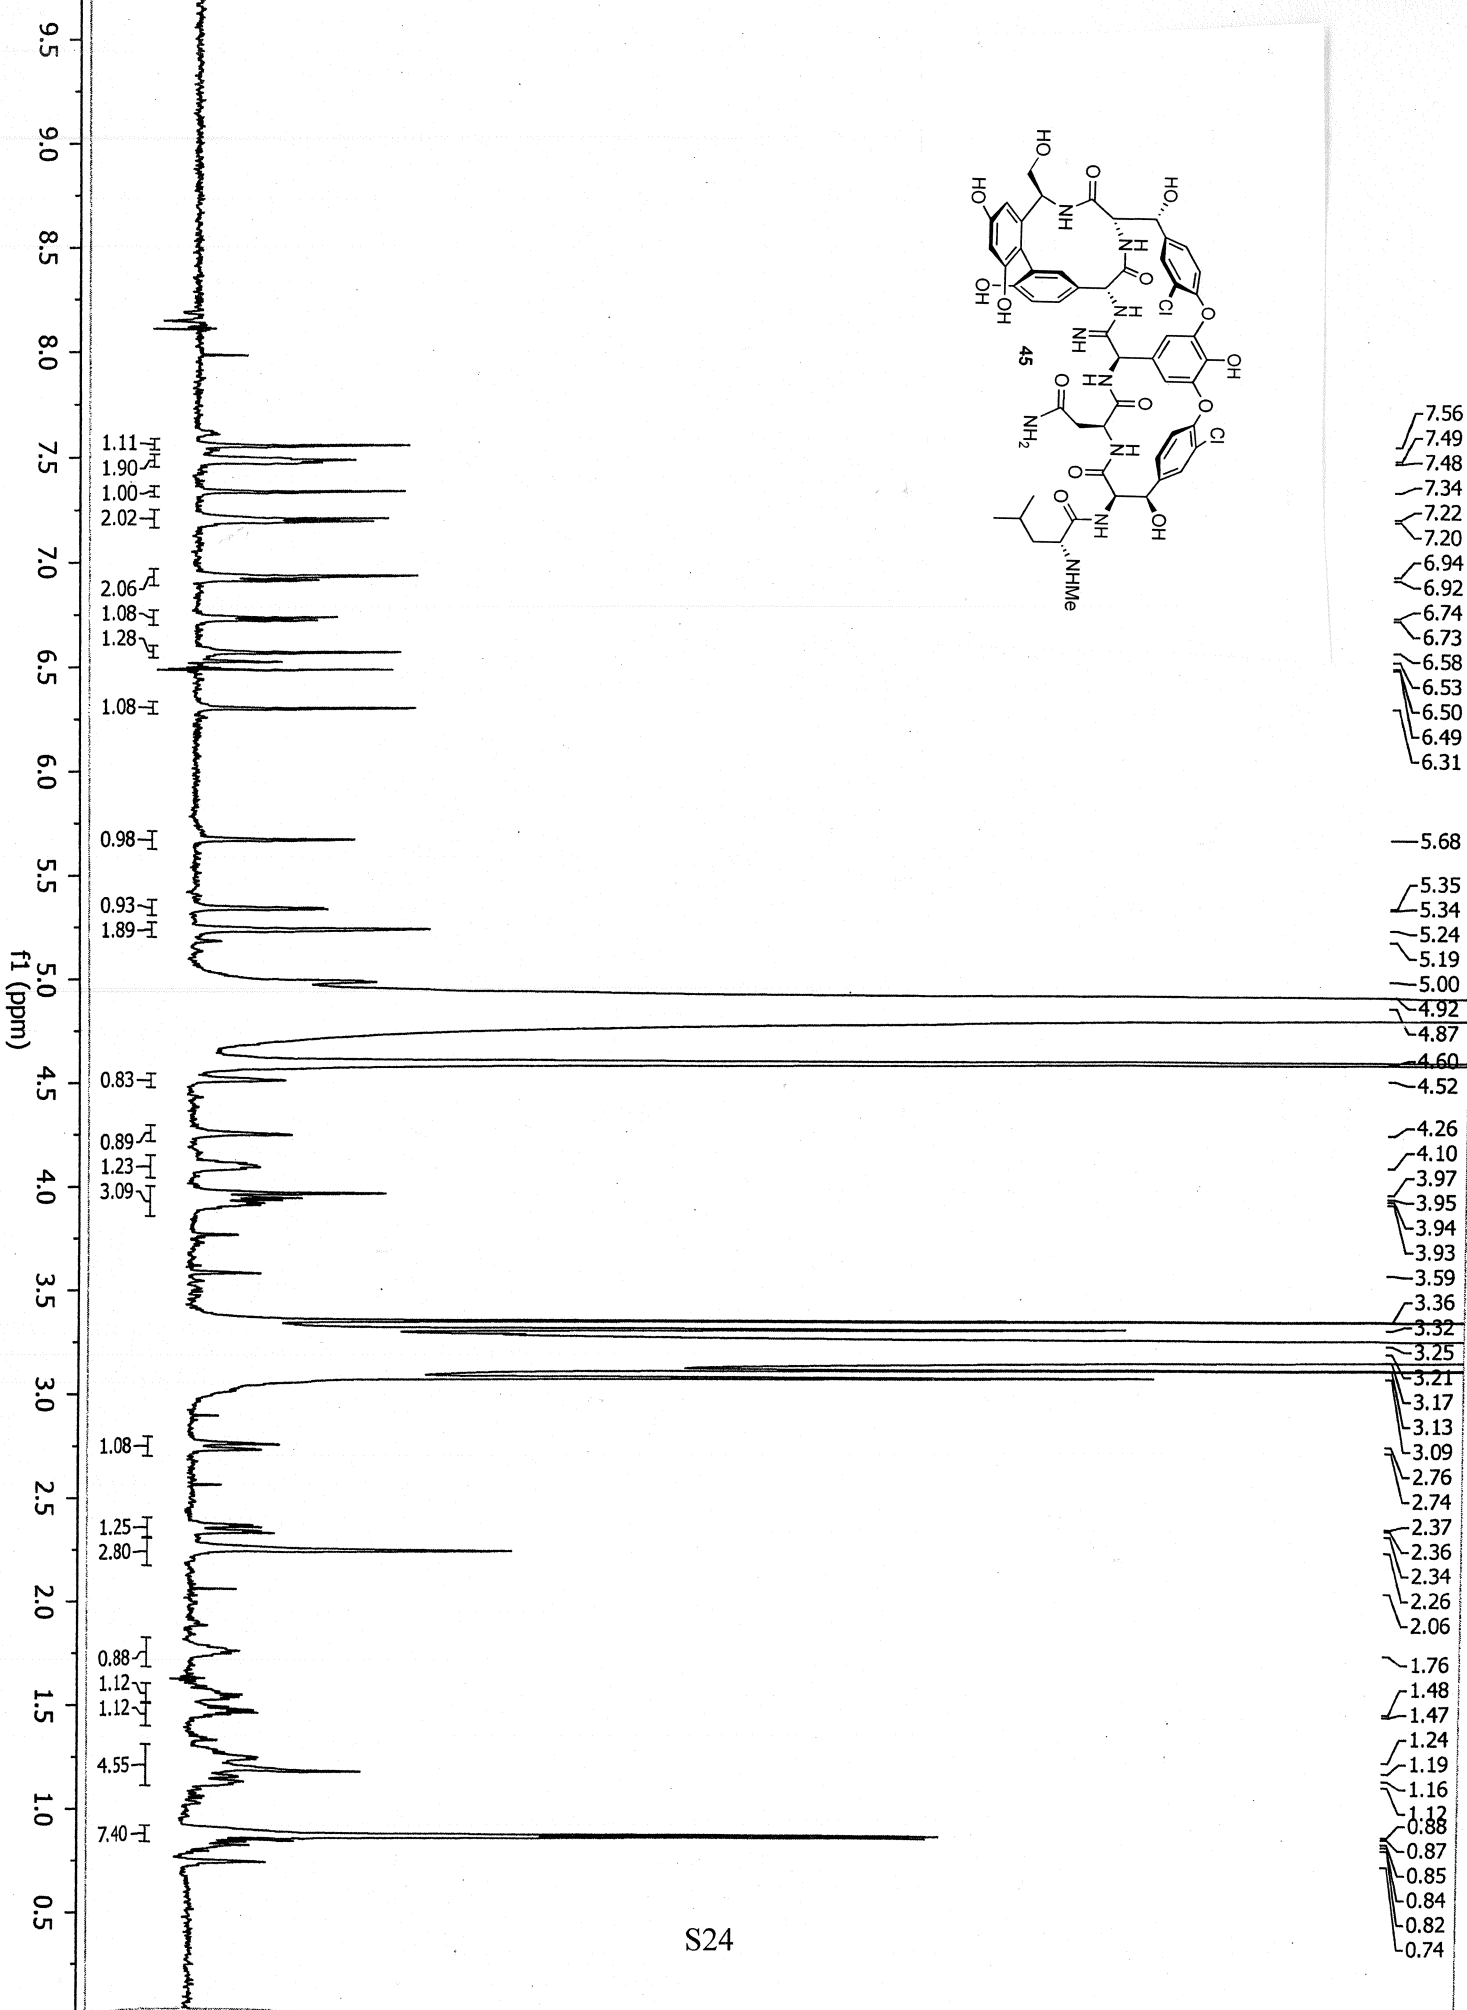

Supplement: NIHMS345915-supplement-1_si_001.pdf [file NIHMS345915-supplement-1_si_001.pdf]
